# Supplementary material for: A Systematic Study on the Degradation Products Generated from Artificially Aged Microplastics
Source: MDPI journal article supplement (doi:10.3390/polym13121997), 2021-06-18
Supplement: s1 [file s1]

# A systematic study on the degradation products generated from artificially aged microplastics

Greta Biale<sup>1</sup>, Jacopo La Nasa<sup>1,2\*</sup>, Marco Mattonai<sup>1</sup>, Andrea Corti<sup>1</sup>, Virginia Vinciguerra<sup>1</sup>, Valter Castelvetro<sup>1,3</sup>, Francesca Modugno<sup>1,3</sup>

<sup>1</sup>Department of Chemistry and Industrial Chemistry, University of Pisa, Pisa, Italy

<sup>2</sup>National Interuniversity Consortium of Materials Science and Technology, Florence, Italy

<sup>3</sup>CISUP—Center for the Integration of Scientific Instruments of the University of Pisa, University of Pisa, Pisa, Italy

## Supplementary Materials

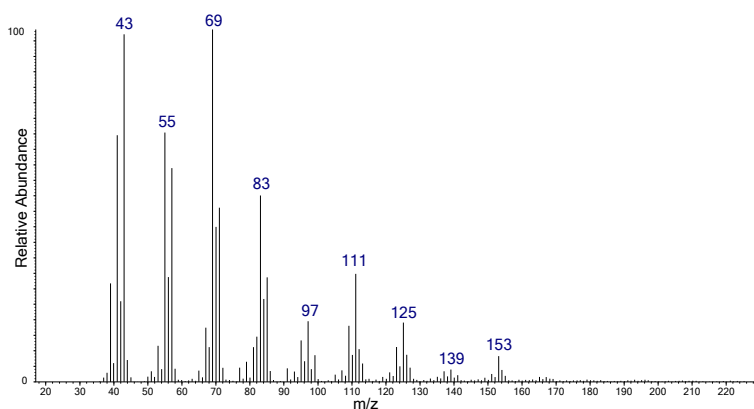

**Figure S.1** Average mass spectrum of the peak (from 421 °C to 480 °C) from the EGA curve (**Figure 3**) of the unaged polypropylene (PP-0w) reference sample.

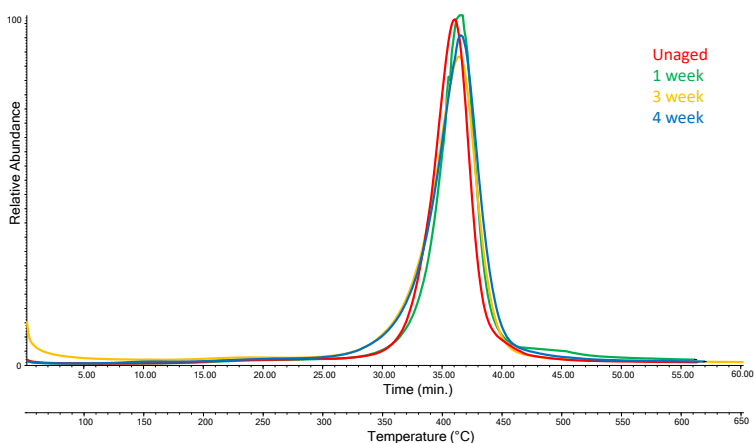

**Figure S.2** EGA profiles of PS after different artificial aging times: PS-0w (red), PS-1w (green), PS-3w (yellow), and PS-4w (blue) accelerated aging.

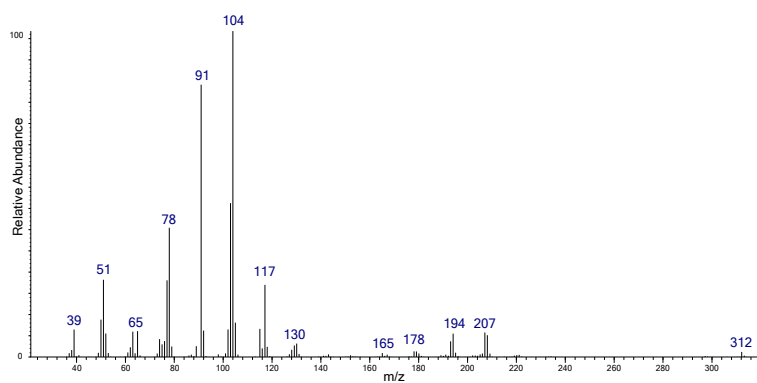

**Figure S.3** Average mass spectrum of the peak (from 350 °C to 450 °C) from the EGA curve (**Figure S.2**) of the unaged polystyrene (PS-0w) reference sample.

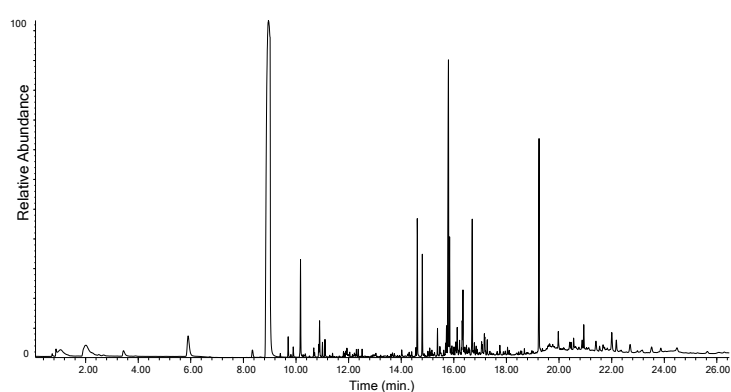

**Figure S.4** Chromatogram obtained in the Py-GC-MS analysis of PS-4w.

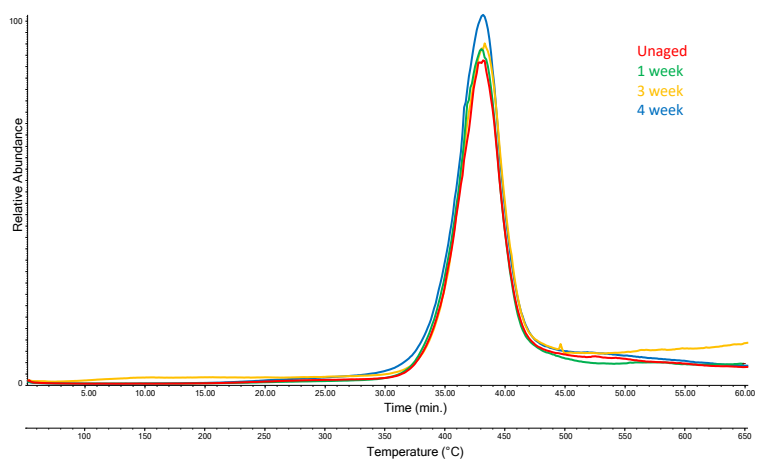

**Figure S.5** EGA profiles of PET after different artificial aging times: PET-0w (red), PET-1w (green), PET-3w (yellow), and PET-4w (blue) accelerated aging.

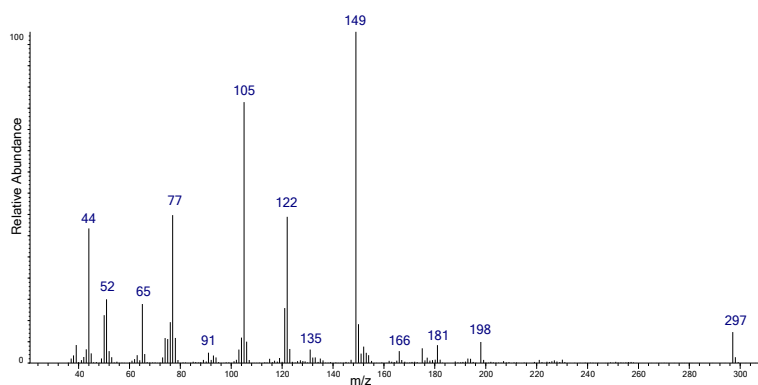

**Figure S.6** Average mass spectrum of the peak (from 381 °C to 463 °C) from the EGA curve (**Figure S.5**) of the unaged polyethylene terephthalate (PET-0w) reference sample.

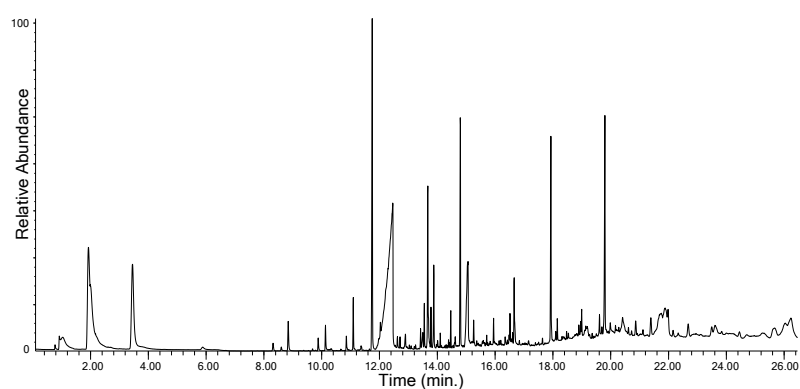

**Figure S.7** Chromatogram obtained in the Py-GC-MS analysis of PET-4w.

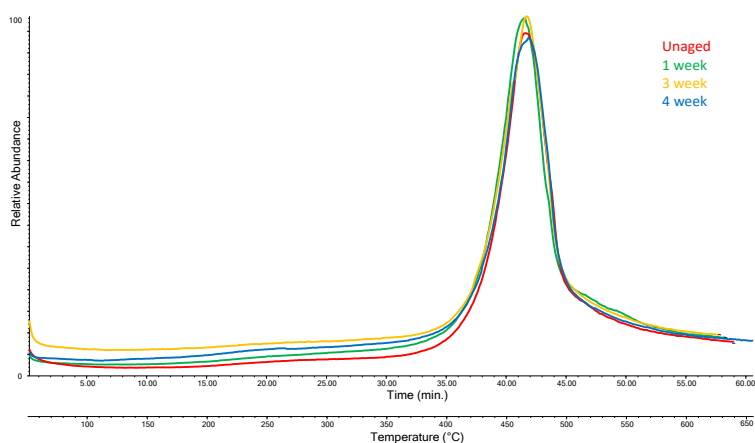

**Figure S.8** EGA profiles of LDPE after different artificial aging times: LDPE-0w (red), LDPE-1w (green), LDPE-3w (yellow), and LDPE-4w (blue) accelerated aging.

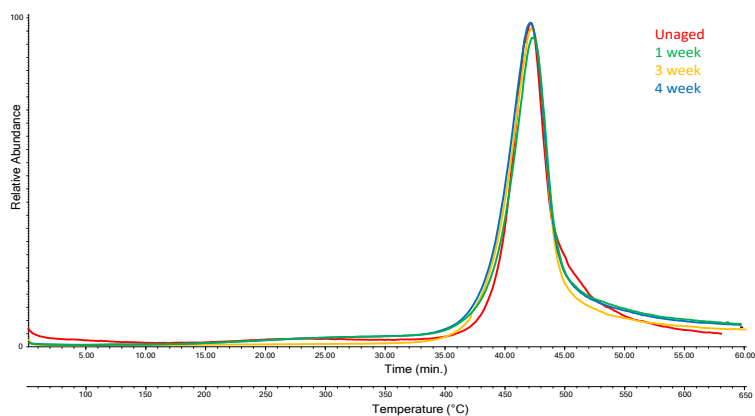

**Figure S.9** EGA profiles of HDPE after different artificial aging times: HDPE-0w (red), HDPE-1w (green), HDPE-3w (yellow), and HDPE-4w (blue) accelerated aging.

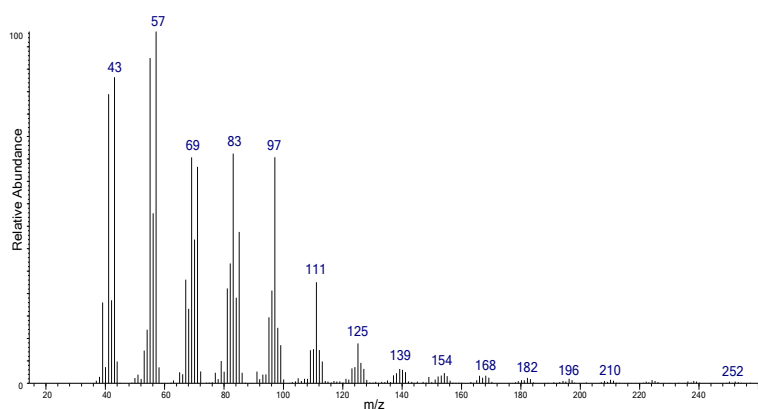

**Figure S.10** Average mass spectrum of the peak (from 424 °C to 499 °C) from the EGA curve (**Figure S.8**) of the unaged low-density polyethylene (LDPE-0w) reference sample.

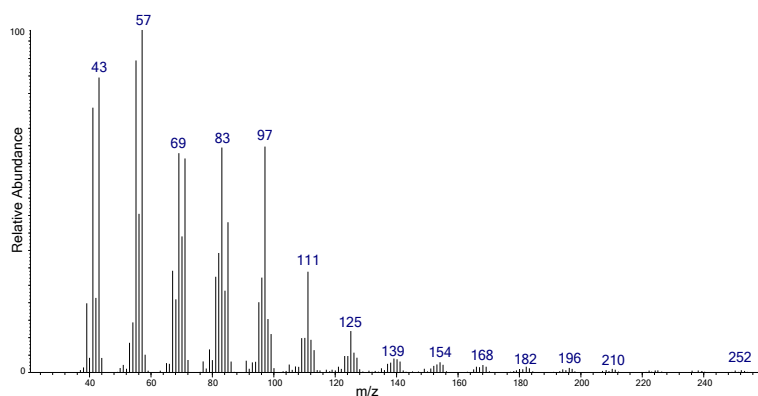

**Figure S.11** Average mass spectrum of the peak (from 439 °C to 504 °C) from the EGA curve (**Figure S.9**) of the unaged high-density polyethylene (HDPE-0w) reference sample.

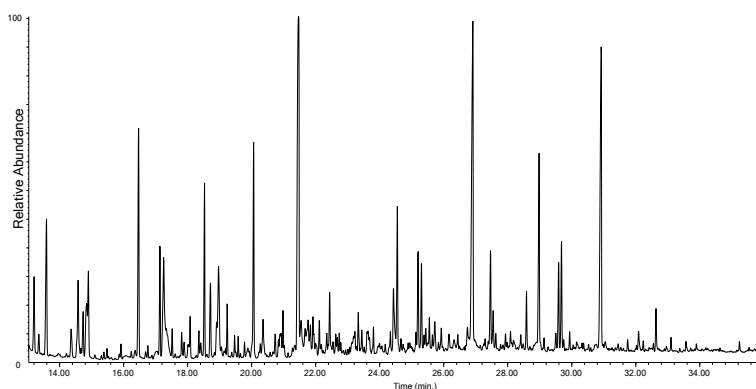

**Figure S.12** Chromatogram obtained in the Py(HMDS)-GC-MS analysis of the DCM extract of PP-0w. The list of the main pyrolysis products is reported in **Table S.8**.

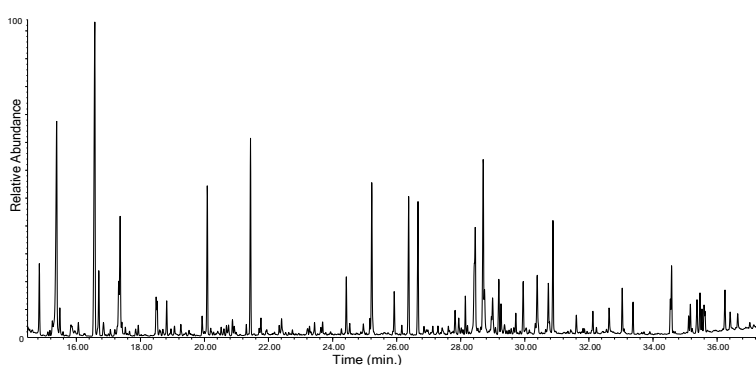

**Figure S.13** Chromatogram obtained in the Py(HMDS)-GC-MS analysis of the MeOH extract of PS-0w. List of the main pyrolysis products is reported in **Table S.9**.

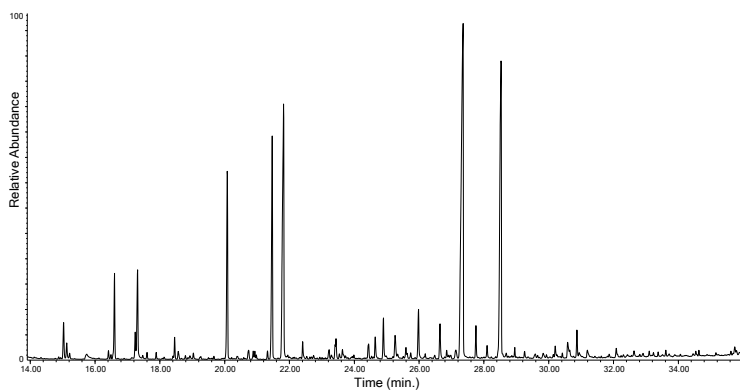

**Figure S.14** Chromatogram obtained in the Py(HMDS)-GC-MS analysis of the DCM extract of PET-0w.

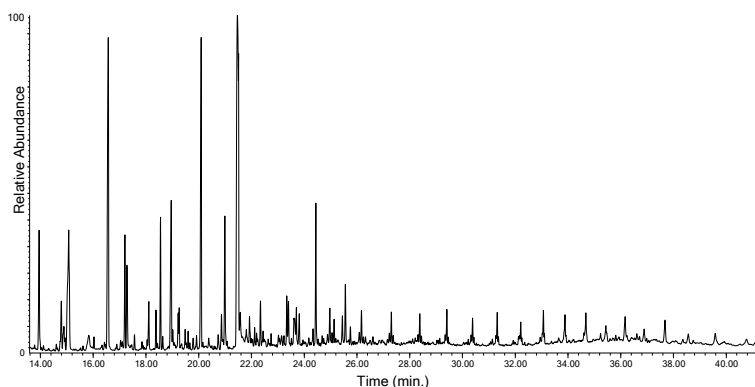

**Figure S.15** Chromatogram obtained in the Py(HMDS)-GC-MS analysis of the DCM extract of LDPE-0w. The list of the main pyrolysis products is reported in **Table S.11**.

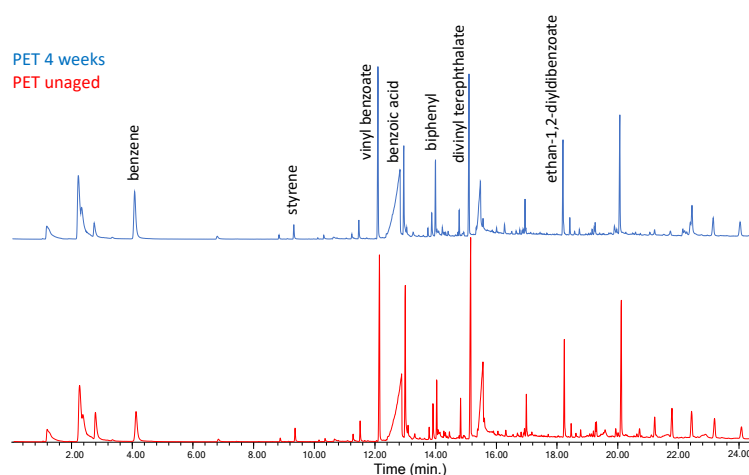

**Figure S.16** Chromatograms obtained in the Py-GC-MS analysis of the extraction residues of the PET-0w (red) and PET-4w (blue). The complete list of the main pyrolysis products is reported in **Table S.16** in the Appendix.

**Table S.1** Identification of peaks in the chromatogram obtained in the Py-GC-MS analysis of PP-0w (Figure 4). M<sup>+</sup> refers to the molecular ion.

| #  | t <sub>r</sub> (min) | Peak identification                 | Main ions (m/z)                                     |
|----|----------------------|-------------------------------------|-----------------------------------------------------|
| 1  | 1.9                  | propene                             | 42 (M <sup>+</sup> ), 41, 39                        |
| 2  | 2.2                  | pentane                             | 72 (M <sup>+</sup> ), 57, 43                        |
| 3  | 2.7                  | 2,methyl-1-pentene                  | 84 (M <sup>+</sup> ), 69, 56, 41                    |
| 4  | 5.6                  | 4-methyl-2-heptene                  | 112 (M <sup>+</sup> ), 69, 55, 41                   |
| 5  | 6.2                  | 2-methyl-1,5-hexadiene              | 95, 81, 67, 55, 39                                  |
| 6  | 8.0                  | 2,4-dimethyl-1-heptene              | 126 (M <sup>+</sup> ), 83, 70, 55, 43               |
| 7  | 8.2                  | 1,3,5-trimethylcyclohexane (isomer) | 126, 111, 69, 55, 41                                |
| 8  | 8.5                  | 2,4-dimethyl-1,6-heptadiene         | 124 (M <sup>+</sup> ), 109, 81, 67, 55, 41          |
| 9  | 8.9                  | 2,4,6-trimethyl-1-heptene           | 140 (M <sup>+</sup> ), 83, 69, 55, 43               |
| 10 | 9.2                  | 2,4,6-trimethyl-1,6-heptadiene      | 138 (M <sup>+</sup> ), 123, 109, 95, 82, 67, 55, 41 |
| 11 | 10.3                 | 4,6-dimethyl-2-nonene               | 154 (M <sup>+</sup> ), 111, 85, 69, 55, 41          |
| 12 | 11.1                 | 2,4,6-trimethyl-1-nonene            | 168 (M <sup>+</sup> ), 125, 111, 83, 69, 57, 43     |

|    |      |                                                             |                                                |
|----|------|-------------------------------------------------------------|------------------------------------------------|
| 13 | 11.2 | 2,4,6-trimethyl-1-nonene                                    | 168 (M+), 125, 111, 83, <b>69</b> , 57, 43     |
| 14 | 11.6 | 2,4,6,8-tetramethyl-1-nonene                                | 182 (M+), 125, 111, 83, <b>69</b> , 57, 43     |
| 15 | 11.8 | 2,4,6,8-tetramethyl-1,8-nonadiene                           | 180 (M+), 123, 109, 96, 83, <b>69</b> , 55, 41 |
| 16 | 13.0 | 2,4,6,8-tetramethyl-1-undecene                              | 210 (M+), 154, 111, 83, <b>69</b> , 55, 43     |
| 17 | 13.1 | 2,4,6,8-tetramethyl-1-undecene                              | 210 (M+), 154, 111, 85, <b>69</b> , 55, 43     |
| 18 | 13.2 | 2,4,6,8-tetramethyl-1-undecene                              | 210 (M+), 154, 111, 85, <b>69</b> , 55, 44     |
| 19 | 13.3 | 2,4,6,8,10-pentamethyl-1-undecene                           | 224 (M+), 125, 111, 97, 83, <b>69</b> , 57, 43 |
| 20 | 13.6 | 2,4,6,8,10-pentamethyl-1,10-undecadiene                     | 222 (M+), 123, 109, 95, 83, <b>69</b> , 55, 41 |
| 21 | 13.9 | unknown                                                     | 153, 125, 111, 97, 85, <b>69</b> , 57, 43      |
| 22 | 14.3 | 2,4,6,8,10-pentamethyl-1,12-tridecadiene                    | 250 (M+), 123, 109, 95, 83, <b>69</b> , 55, 41 |
| 23 | 14.5 | 2,4,6,8,10-pentamethyl-1-tridecene                          | 252 (M+), 125, 111, 97, 83, <b>69</b> , 57, 43 |
| 24 | 14.6 | unknown                                                     | 196, 125, 111, 97, 83, <b>69</b> , 57, 43      |
| 25 | 14.7 | unknown                                                     | 153, 125, 111, 97, 83, <b>69</b> , 57, 43      |
| 26 | 14.9 | 2,4,6,8,10,12-hexamethyl-1,12-tridecadiene                  | 264 (M+), 123, 109, 95, 83, <b>69</b> , 55, 41 |
| 27 | 15.6 | 2,4,6,8,10,12-hexamethyl-1,14-pentadecadiene                | 292 (M+), 137, 109, 97, 83, <b>69</b> , 55, 41 |
| 28 | 15.7 | 2,4,6,8,10,12-hexamethyl-1-pentadecene                      | 294 (M+), 139, 111, 97, 83, <b>69</b> , 57, 43 |
| 29 | 15.9 | unknown                                                     | 294, 139, 125, 111, 97, 83, <b>69</b> , 57, 43 |
| 30 | 16.1 | 2,4,6,8,10,12,14-heptamethyl-1,14-pentadecadiene            | 306 (M+), 123, 109, 97, 83, <b>69</b> , 55, 41 |
| 31 | 16.8 | 2,4,6,8,10,12,14-heptamethyl-1,16-heptadecadiene            | 334 (M+), 123, 109, 97, 83, <b>69</b> , 55, 41 |
| 32 | 16.9 | 2,4,6,8,10,12,14-heptamethyl-1-heptadecene                  | 336 (M+), 125, 111, 97, 83, <b>69</b> , 57, 43 |
| 33 | 17.0 | unknown                                                     | 153, 125, 111, 97, 83, <b>69</b> , 57, 43      |
| 34 | 17.1 | unknown                                                     | 153, 125, 111, 97, 83, <b>69</b> , 57, 43      |
| 35 | 17.2 | 2,4,6,8,10,12,14,16-octamethyl-1,16-heptadecadiene          | 348 (M+), 123, 109, 97, 83, <b>69</b> , 55, 41 |
| 36 | 17.8 | 2,4,6,8,10,12,14,16-octamethyl-1,18-nonadecadiene           | 376 (M+), 125, 109, 97, 83, <b>69</b> , 55, 41 |
| 37 | 17.9 | 2,4,6,8,10,12,14,16-octamethyl-1-nonadecene                 | 378 (M+), 125, 111, 97, 83, <b>69</b> , 57, 43 |
| 38 | 18.2 | 2,4,6,8,10,12,14,16,18-nonamethyl-1,18-nonadecadiene        | 390 (M+), 125, 109, 97, 83, <b>69</b> , 55, 41 |
| 39 | 18.7 | 2,4,6,8,10,12,14,16,18-nonamethyl-1,20-henicosadiene        | 418 (M+), 125, 111, 97, 83, <b>69</b> , 55, 41 |
| 40 | 18.8 | 2,4,6,8,10,12,14,16,18-nonamethyl-1-henicosene              | 420 (M+), 125, 111, 97, 83, <b>69</b> , 57, 43 |
| 41 | 19.1 | 2,4,6,8,10,12,14,16,18,20-decamethyl-1,20-henicosadiene     | 432 (M+), 125, 109, 97, 83, <b>69</b> , 55, 43 |
| 42 | 19.6 | 2,4,6,8,10,12,14,16,18,20-decamethyl-1,22-tricosadiene      | 460 (M+), 125, 111, 97, 83, <b>69</b> , 55, 41 |
| 43 | 19.7 | 2,4,6,8,10,12,14,16,18,20-decamethyl-1-tricosene            | 153, 139, 125, 111, 97, 83, <b>69</b> , 57, 43 |
| 44 | 20.0 | 2,4,6,8,10,12,14,16,18,20,22-undecamethyl-1,22-tricosadiene | 474 (M+), 125, 111, 97, 83, <b>69</b> , 55, 43 |

**Table S.2** Identification of peaks in the chromatogram obtained in the Py-GC-MS analysis of PS-0w (Figure 5).

| # | t <sub>r</sub> (min) | Peak identification         | Main ions ( <i>m/z</i> )              |
|---|----------------------|-----------------------------|---------------------------------------|
| 1 | 6.0                  | toluene                     | 92, <b>91</b> , 65                    |
| 2 | 8.9                  | styrene                     | <b>104</b> , 78, 63, 51               |
| 3 | 9.7                  | allylbenzene                | <b>117</b> , 103, 91, 65              |
| 4 | 9.9                  | benzaldehyde                | 106, <b>105</b> , 77, 51              |
| 5 | 10.2                 | α-methylstyrene             | <b>118</b> , 103, 91, 78, 63, 51      |
| 6 | 10.8                 | 3-butenylbenzene            | 132, 104, <b>91</b> , 65              |
| 7 | 11.0                 | (1-methylenepropyl)-benzene | 132, <b>117</b> , 103, 91, 77, 63, 51 |
| 8 | 11.1                 | acetophenone                | 120, <b>105</b> , 91, 77, 51          |

|    |      |                                                 |                                             |
|----|------|-------------------------------------------------|---------------------------------------------|
| 9  | 14.6 | 1,2-diphenylethane                              | 182, <b>91</b> , 65                         |
| 10 | 14.8 | propane-1,2-diyl dibenzene                      | 196, <b>105</b> , 91, 77, 65                |
| 11 | 15.4 | 1,1'-(1,3-propanediyl)bis-benzene               | 196, 105, <b>92</b> , 77, 65, 51            |
| 12 | 15.7 | stilbene                                        | 180, <b>179</b> , 165, 152, 102, 89, 76     |
| 13 | 15.8 | 3-butene-1,3-diyl dibenzene (styrene dimer)     | 208, 193, 130, 115, 104, <b>91</b> , 77, 65 |
| 14 | 15.9 | 1-pentene-2,4-diyl dibenzene                    | 222, 194, 179, 115, <b>105</b> , 91, 77     |
| 15 | 16.3 | (E)-1-butene-1,4-diyl dibenzene                 | 208, <b>117</b> , 115, 91, 65               |
| 16 | 16.7 | hexa-1,5-diene-2,5-diyl dibenzene               | 234, 143, <b>130</b> , 115, 104, 91, 77, 65 |
| 17 | 19.2 | 5-hexene-1,3,5-triyltribenzene (styrene trimer) | 312, 207, 194, 117, <b>91</b> , 77          |

**Table S.3** Identification of peaks in the chromatogram obtained in the Py-GC-MS analysis of PET-0w (Figure 6).

| #  | t <sub>r</sub> (min) | Peak identification                      | Main ions ( <i>m/z</i> )                |
|----|----------------------|------------------------------------------|-----------------------------------------|
| 1  | 2.0                  | carbon dioxide                           | <b>44</b>                               |
| 2  | 3.5                  | benzene                                  | <b>78</b> , 63, 51                      |
| 3  | 8.3                  | ethylbenzene                             | 106, <b>91</b> , 77, 65, 51             |
| 4  | 8.9                  | styrene                                  | <b>104</b> , 78, 63, 51                 |
| 5  | 9.9                  | benzaldehyde                             | 106, <b>105</b> , 77, 51                |
| 6  | 10.1                 | phenol                                   | <b>94</b> , 79, 66, 55, 39              |
| 7  | 10.9                 | benzeneacetaldehyde                      | 120, <b>91</b> , 65, 51                 |
| 8  | 11.1                 | acetophenone                             | 120, <b>105</b> , 77, 51                |
| 9  | 11.8                 | vinyl benzoate                           | 148, <b>105</b> , 77, 51                |
| 10 | 12.4                 | benzoic acid                             | 122, <b>105</b> , 77, 51                |
| 11 | 13.7                 | biphenyl                                 | <b>154</b> , 131, 115, 76               |
| 12 | 14.8                 | divinyl terephthalate                    | <b>175</b> , 147, 132, 104, 76          |
| 13 | 15.1                 | 4-(vinylloxycarbonyl) benzoic acid       | <b>149</b> , 121, 76, 65                |
| 14 | 15.2                 | benzophenone                             | 182, 152, <b>105</b> , 77, 51           |
| 15 | 15.7                 | stilbene                                 | <b>180</b> , 179, 165, 152, 102, 89, 76 |
| 16 | 15.9                 | 9H-fluoren-9-one                         | <b>180</b> , 152, 126, 76               |
| 17 | 16.7                 | unknown                                  | 198, <b>181</b> , 152, 76               |
| 18 | 17.9                 | ethan-1,2-divinyldibenzoate              | 227, <b>105</b> , 77, 51                |
| 19 | 18.2                 | unknown                                  | <b>230</b> , 198, 181, 152, 115         |
| 20 | 19.0                 | unknown                                  | 296, 149, <b>131</b> , 105, 77, 51      |
| 21 | 19.8                 | 2-(benzoyloxy) ethyl vinyl terephthalate | <b>297</b> , 149, 105, 77               |
| 22 | 22.0                 | ethan-1,2-diyl divinyl diterephthalate   | <b>367</b> , 325, 296, 175, 162, 104    |

**Table S.4** Identification of peaks in the chromatogram obtained in the Py-GC-MS analysis of LDPE-0w (Figure 7). M<sup>+</sup> refers to the molecular ion.

| # | tr (min) | Peak identification | Main ions ( <i>m/z</i> )                          |
|---|----------|---------------------|---------------------------------------------------|
| 1 | 2.7      | 1-hexene            | 84 (M <sup>+</sup> ), 69, <b>56</b> , 41          |
| 2 | 3.9      | 1-heptene           | 98 (M <sup>+</sup> ), 83, 70, <b>56</b> , 41      |
| 3 | 4.0      | heptane             | 100 (M <sup>+</sup> ), 71, 57, <b>43</b>          |
| 4 | 6.7      | 1-octene            | 112 (M <sup>+</sup> ), 97, 83, 70, <b>55</b> , 41 |
| 5 | 6.9      | octane              | 114 (M <sup>+</sup> ), 85, 71, 57, <b>43</b>      |
| 6 | 8.7      | 1,8-nonadiene       | 109, 96, 81, <b>67</b> , 55, 41                   |
| 7 | 8.8      | 1-nonene            | 126 (M <sup>+</sup> ), 97, 83, 69, <b>56</b> , 41 |
| 8 | 9.0      | nonane              | 128 (M <sup>+</sup> ), 99, 85, 71, 57, <b>43</b>  |
| 9 | 10.1     | 1,9-decadiene       | 110, 95, 81, 67, <b>55</b> , 41                   |



|    |       |                     |                                                     |
|----|-------|---------------------|-----------------------------------------------------|
| 10 | 10.2  | 1-decene            | 140 (M+), 111, 97, 83, 70, 55, <b>41</b>            |
| 11 | 10.3  | decane              | 142 (M+), 117, 99, 85, 71, <b>57</b> , 43           |
| 12 | 11.2  | 1,10-undecadiene    | 124, 109, 95, 81, 67, 55, <b>41</b>                 |
| 13 | 11.3  | 1-undecene          | 154 (M+), 126, 111, 97, 83, 70, 55, <b>43</b>       |
| 14 | 11.4  | undecane            | 156 (M+), 98, 85, 71, <b>57</b> , 43                |
| 15 | 12.1  | 1,11-dodecadiene    | 138, 124, 109, 95, 81, 67, <b>55</b> , 41           |
| 16 | 12.13 | 1-dodecene          | 168 (M+), 140, 125, 111, 97, 83, 69, 55, <b>41</b>  |
| 17 | 12.2  | dodecane            | 170 (M+), 128, 85, 71, <b>57</b> , 43               |
| 18 | 12.3  | decanal             | 138, 128, 112, 95, 82, 68, 55, <b>41</b>            |
| 19 | 12.8  | 1,12-tridecadiene   | 123, 109, 95, 81, 67, <b>55</b> , 41                |
| 20 | 12.9  | 1-tridecene         | 125, 111, 97, 83, 69, 55, <b>41</b>                 |
| 21 | 13.0  | tridecane           | 184 (M+), 99, 85, 71, <b>57</b> , 43                |
| 22 | 13.05 | undecanal           | 152, 126, 109, 96, 82, 68, 55, <b>41</b>            |
| 23 | 13.5  | 1,13-tetradecadiene | 123, 109, 96, 81, 67, <b>55</b> , 41                |
| 24 | 13.6  | 1-tetradecene       | 125, 111, 97, 83, 69, <b>55</b> , 41                |
| 25 | 13.64 | tetradecane         | 198 (M+), 99, 85, 71, <b>57</b> , 43                |
| 26 | 13.72 | dodecanal           | 166, 140, 123, 110, 96, 82, 68, <b>57</b> , 41      |
| 27 | 14.2  | 1,14-pentadecadiene | 123, 109, 96, 81, 67, <b>55</b> , 41                |
| 28 | 14.25 | 1-pentadecene       | 210 (M+), 125, 111, 97, 83, 69, <b>55</b> , 41      |
| 29 | 14.3  | pentadecane         | 212 (M+), 113, 99, 85, 71, <b>57</b> , 43           |
| 30 | 14.4  | tridecanal          | 180, 154, 124, 110, 96, 82, 68, <b>57</b> , 43      |
| 31 | 14.8  | 1,15-hexadecadiene  | 123, 109, 96, 82, 67, <b>55</b> , 41                |
| 32 | 14.86 | 1-hexadecene        | 224 (M+), 125, 111, 97, 83, 69, <b>55</b> , 41      |
| 33 | 14.9  | hexadecane          | 226 (M+), 99, 85, 71, <b>57</b> , 43                |
| 34 | 15.0  | tetradecanal        | 194, 168, 138, 110, 96, 82, 69, <b>57</b> , 41      |
| 35 | 15.4  | 1,16-heptadecadiene | 137, 123, 109, 96, 82, 69, <b>55</b> , 41           |
| 36 | 15.44 | 1-heptadecene       | 238 (M+), 139, 125, 111, 97, 83, 69, <b>55</b> , 41 |
| 37 | 15.5  | heptadecane         | 240 (M+), 99, 85, 71, <b>57</b> , 43                |
| 38 | 15.6  | pentadecanal        | 208, 180, 111, 96, 82, 69, 57, <b>41</b>            |
| 39 | 15.9  | 1,17-octadecadiene  | 123, 109, 96, 82, 69, <b>55</b> , 41                |
| 40 | 16.0  | 1-octadecene        | 252 (M+), 125, 111, <b>97</b> , 83, 69, 55, 41      |
| 41 | 16.02 | octadecane          | 254 (M+), 99, 85, 71, <b>57</b> , 43                |
| 42 | 16.1  | hexadecanal         | 222, 124, 111, 96, 82, 69, <b>57</b> , 43           |
| 43 | 16.5  | 1,18-nonadecadiene  | 137, 123, 109, 96, 82, 69, <b>55</b> , 41           |
| 44 | 16.51 | 1-nonadecene        | 139, 125, 111, 97, <b>83</b> , 69, 55, 43           |
| 45 | 16.54 | nonadecane          | 268 (M+), 127, 113, 99, 85, 71, <b>57</b> , 43      |
| 46 | 16.7  | heptadecanal        | 236, 208, 137, 124, 109, 96, <b>82</b> , 68, 57, 41 |
| 47 | 16.97 | 1,19-eicosadiene    | 137, 123, 109, 96, 82, 69, <b>55</b> , 41           |
| 48 | 17.01 | 1-eicosene          | 139, 125, 111, <b>97</b> , 83, 69, 55, 43           |
| 49 | 17.04 | eicosane            | 127, 113, 99, 85, 71, <b>57</b> , 43                |
| 50 | 17.1  | octadecanal         | 250, 137, 124, 109, 96, <b>82</b> , 68, 57, 43      |
| 51 | 17.4  | 1,20-heneicosadiene | 137, 123, 109, 96, 82, 69, <b>55</b> , 41           |
| 52 | 17.48 | 1-heneicosene       | 139, 125, 111, <b>97</b> , 83, 69, 55, 43           |
| 53 | 17.50 | heneicosane         | 113, 97, 85, 71, <b>57</b> , 43                     |
| 54 | 17.6  | nonadecanal         | 264, 202, 137, 124, 110, 97, <b>82</b> , 69, 57, 43 |
| 55 | 17.91 | 1,21-docosadiene    | 151, 137, 123, 109, 96, 82, 67, <b>55</b> , 41      |
| 56 | 17.94 | 1-docosene          | 139, 125, 111, <b>97</b> , 83, 69, 55, 43           |
| 57 | 17.96 | docosane            | 310 (M+), 99, 85, 71, <b>57</b> , 43                |
| 58 | 18.1  | eicosanal           | 278, 250, 123, 111, 96, 82, 69, <b>57</b> , 43      |
| 59 | 18.3  | 1,22-tricosadiene   | 137, 123, 109, 96, 82, 69, <b>55</b> , 41           |
| 60 | 18.37 | 1-tricosene         | 322 (M+), 125, 111, <b>97</b> , 83, 69, 55, 43      |
| 61 | 18.39 | tricosane           | 324 (M+), 113, 97, 85, 71, <b>57</b> , 43           |

|    |       |                     |                                                     |
|----|-------|---------------------|-----------------------------------------------------|
| 62 | 18.5  | heneicosanal        | 292, 138, 123, 111, 96, 82, 68, <b>57</b> , 43      |
| 63 | 18.77 | 1,23-tetracosadiene | 334 (M+), 137, 123, 109, 96, 82, 69, <b>55</b> , 41 |
| 64 | 18.8  | 1-tetracosene       | 336 (M+), 139, 125, 111, <b>97</b> , 83, 69, 57, 43 |
| 65 | 19.0  | docosanal           | 306, 251, 138, 124, 111, 96, 82, 71, <b>57</b> , 43 |
| 66 | 19.2  | 1-pentacosene       | 350 (M+), 139, 125, 111, <b>97</b> , 83, 69, 57, 43 |
| 67 | 19.35 | tricosanal          | 320, 139, 125, 111, 97, 83, 71, <b>57</b> , 43      |
| 68 | 19.6  | 1-hexacosene        | 364 (M+), 139, 125, 111, <b>97</b> , 83, 69, 57, 43 |
| 69 | 19.8  | unknown             | <b>297</b> , 149, 105, 77                           |

**Table S.5** Identification of peaks in the chromatogram obtained in the Py-GC-MS analysis of LDPE-4w.

| #  | t <sub>r</sub> | Peak identification | Main ions ( <i>m/z</i> )                           |
|----|----------------|---------------------|----------------------------------------------------|
| 1  | 2.7            | 1-hexene            | 84, 69, <b>56</b> , 41                             |
| 2  | 3.9            | 1-heptene           | 98, 83, 70, <b>56</b> , 41                         |
| 3  | 4.0            | heptane             | 100, 71, 57, <b>43</b>                             |
| 4  | 6.7            | 1-octene            | 112, 97, 83, 70, <b>55</b> , 41                    |
| 5  | 6.9            | octane              | 114, 85, 71, 57, <b>43</b>                         |
| 6  | 8.7            | 1,8-nonadiene       | 109, 96, 81, <b>67</b> , 55, 41                    |
| 7  | 8.9            | 1-nonene            | 126, 97, 83, 69, <b>56</b> , 41                    |
| 8  | 9.0            | nonane              | 128, 99, 85, 71, 57, <b>43</b>                     |
| 9  | 10.1           | 1,9-decadiene       | 110, 95, 81, 67, <b>55</b> , 41                    |
| 10 | 10.2           | 1-decene            | 140, 111, 97, 83, 70, 55, <b>41</b>                |
| 11 | 10.35          | decane              | 142, 113, 99, 85, 71, <b>57</b> , 43               |
| 12 | 11.2           | 1,10-undecadiene    | 124, 109, 95, 81, 67, 55, <b>41</b>                |
| 13 | 11.3           | 1-undecene          | 154, 126, 111, 97, 83, 70, 55, <b>41</b>           |
| 14 | 11.36          | undecane            | 156, 98, 85, 71, <b>57</b> , 43                    |
| 15 | 12.1           | 1,11-dodecadiene    | 138, 124, 109, 95, 81, 67, <b>55</b> , 41          |
| 16 | 12.15          | 1-dodecene          | 168, 140, 125, 111, 97, 83, 69, 55, <b>41</b>      |
| 17 | 12.2           | dodecane            | 170, 127, 85, 71, <b>57</b> , 43                   |
| 18 | 12.3           | decanal             | 138, 128, 112, 95, 82, 70, 57, <b>41</b>           |
| 19 | 12.7           | nonanoic acid       | 158, 129, 115, 98, 85, 73, <b>57</b> , 41          |
| 20 | 12.8           | 1,12-tridecadiene   | 123, 109, 95, 81, 67, <b>55</b> , 41               |
| 21 | 12.9           | 1-tridecene         | 125, 111, 97, 83, 69, <b>55</b> , 41               |
| 22 | 13.0           | tridecane           | 184, 99, 85, 71, <b>57</b> , 43                    |
| 23 | 13.03          | undecanal           | 142, 126, 109, 96, 82, 68, 57, <b>41</b>           |
| 24 | 13.4           | decanoic acid       | 172, 129, <b>73</b> , 55, 41                       |
| 25 | 13.48          | undecanol           | 126, 111, 97, <b>85</b> , 69, 55, 43               |
| 26 | 13.5           | 1,13-tetradecadiene | 123, 109, 96, 81, 67, <b>55</b> , 41               |
| 27 | 13.6           | 1-tetradecene       | 125, 111, 97, 83, 69, <b>55</b> , 41               |
| 28 | 13.66          | tetradecane         | 198, 99, 85, 71, <b>57</b> , 43                    |
| 29 | 13.7           | dodecanal           | 166, 140, 123, 110, 96, 82, 68, <b>57</b> , 41     |
| 30 | 14.05          | undecanoic acid     | 186, 143, 129, 115, 83, <b>73</b> , 60, 41         |
| 31 | 14.1           | dodecanol           | 141, 127, 111, 97, 83, 69, <b>57</b> , 41          |
| 32 | 14.2           | 1,14-pentadecadiene | 123, 109, 96, 82, 67, <b>55</b> , 41               |
| 33 | 14.26          | 1-pentadecene       | 210, 125, 111, 97, 83, 69, <b>55</b> , 41          |
| 34 | 14.3           | pentadecane         | 141, 127, 113, 99, 85, 71, <b>57</b> , 43          |
| 35 | 14.4           | tridecanal          | 180, 154, 124, 110, 96, 82, 68, <b>57</b> , 41     |
| 36 | 14.6           | dodecanoic acid     | 200, 157, 129, 115, 98, 85, <b>73</b> , 60, 43     |
| 37 | 14.77          | tridecanol          | 182, 155, 141, 125, 111, 97, 83, 69, 55, <b>43</b> |
| 38 | 14.8           | 1,15-hexadecadiene  | 123, 109, 96, 82, 69, <b>55</b> , 41               |
| 39 | 14.87          | 1-hexadecene        | 224, 125, 111, 97, 83, 69, <b>55</b> , 41          |

|    |       |                     |                                                       |
|----|-------|---------------------|-------------------------------------------------------|
| 40 | 14.9  | hexadecane          | 226, 99, 85, 71, <b>57</b> , 43                       |
| 41 | 15.0  | tetradecanal        | 194, 168, 138, 124, 109, 96, 82, 69, <b>57</b> , 41   |
| 42 | 15.2  | tridecanoic acid    | 214, 185, 171, 157, 143, 129, 115, 85, <b>73</b> , 60 |
| 43 | 15.37 | tetradecanol        | 169, 125, 111, 97, 83, 69, <b>55</b> , 41             |
| 44 | 15.4  | 1,16-heptadecadiene | 137, 123, 109, 96, 82, 69, <b>55</b> , 41             |
| 45 | 15.45 | 1-heptadecene       | 238, 139, 125, 111, 97, <b>83</b> , 69, 55, 41        |
| 46 | 15.5  | heptadecane         | 240, 99, 85, 71, <b>57</b> , 43                       |
| 47 | 15.6  | pentadecanal        | 208, 182, 109, 96, <b>82</b> , 69, 57, 43             |
| 48 | 15.8  | tetradecanoic acid  | 228, 185, 129, <b>73</b>                              |
| 49 | 15.93 | pentadecanol        | 183, 125, 111, 97, 83, 70, <b>57</b> , 41             |
| 50 | 15.96 | 1,17-octadecadiene  | 123, 109, 96, 82, 69, <b>55</b> , 41                  |
| 51 | 16.0  | 1-octadecene        | 252, 125, 111, 97, <b>83</b> , 69, 55, 43             |
| 52 | 16.03 | octadecane          | 254, 99, 85, 71, <b>57</b> , 43                       |
| 53 | 16.05 | 2-hexadecanone      | 240, 111, 97, 85, 71, 58, <b>43</b>                   |
| 54 | 16.1  | hexadecanal         | 222, 123, 109, 96, <b>82</b> , 68, 57, 43             |
| 55 | 16.3  | pentadecanoic acid  | 242, 199, 129, <b>73</b> , 57                         |
| 56 | 16.46 | hexadecanol         | 197, 125, 111, 97, 83, 69, <b>55</b> , 41             |
| 57 | 16.5  | 1,18-nonadecadiene  | 137, 123, 109, 96, 82, 69, <b>55</b> , 41             |
| 58 | 16.53 | 1-nonadecene        | 139, 125, 111, <b>97</b> , 83, 69, 55, 43             |
| 59 | 16.55 | nonadecane          | 268, 127, 113, 99, 85, 71, <b>57</b> , 43             |
| 60 | 16.58 | 2-heptadecanone     | 254, 85, 71, <b>58</b> , 43                           |
| 61 | 16.7  | heptadecanal        | 236, 208, 137, 123, 109, 96, <b>82</b> , 68, 57, 43   |
| 62 | 16.8  | hexadecanoic acid   | 256, 213, 129, <b>73</b> , 55, <b>43</b>              |
| 63 | 16.99 | 1,19-eicosadiene    | 137, 123, 109, 96, 82, 69, <b>55</b> , 41             |
| 64 | 17.0  | 1-eicosene          | 139, 125, 111, <b>97</b> , 83, 69, 55, 43             |
| 65 | 17.04 | eicosane            | 127, 113, 99, 85, 71, <b>57</b> , 43                  |
| 66 | 17.09 | 2-octadecanone      | 268, 114, 96, 85, 71, <b>58</b> , 43                  |
| 67 | 17.2  | octadecanal         | 250, 137, 124, 109, 96, <b>82</b> , 68, 57, 43        |
| 68 | 17.3  | heptadecanoic acid  | 270, 227, 185, 171, 129, <b>70</b> , <b>55</b>        |
| 69 | 17.47 | 1,20-heneicosadiene | 137, 123, 109, 96, 82, 69, <b>55</b> , 41             |
| 70 | 17.5  | 1-heneicosene       | 139, 125, 111, <b>97</b> , 83, 69, 55, 43             |
| 71 | 17.52 | heneicosane         | 113, 99, 85, 71, <b>57</b> , 43                       |
| 72 | 17.56 | 2-nonadecanone      | 282, 127, 113, 95, 85, 71, <b>58</b> , 43             |
| 73 | 17.65 | nonadecanal         | 264, 236, 137, 123, 109, 96, <b>82</b> , 69, 57, 43   |
| 74 | 17.8  | octadecanoic acid   | 284, 241, 185, 129, 97, <b>57</b>                     |
| 75 | 17.92 | 1,21-docosadiene    | 137, 123, 109, 96, 82, 69, <b>55</b> , 41             |
| 76 | 17.95 | 1-docosene          | 139, 125, 111, <b>97</b> , 83, 69, 57, 43             |
| 77 | 17.97 | docosane            | 310, 99, 85, 71, <b>57</b> , 43                       |
| 78 | 18.02 | 2-eicosanone        | 296, 127, 96, 85, 71, <b>58</b> , 43                  |
| 79 | 18.1  | eicosanal           | 278, 250, 123, 109, 96, <b>82</b> , 69, 57, 43        |
| 80 | 18.2  | nonadecanoic acid   | 298, 255, 129, 83, 69, <b>57</b> , 43                 |
| 81 | 18.36 | 1,22-tricosadiene   | 137, 123, 109, 96, 82, 69, <b>55</b> , 41             |
| 82 | 18.39 | 1-tricosene         | 322, 125, 111, <b>97</b> , 83, 69, 57, 43             |
| 83 | 18.40 | tricosane           | 324, 113, 97, 85, 71, <b>57</b> , 43                  |
| 84 | 18.46 | 2-heneicosanone     | 310, 127, 109, 96, 82, 71, <b>59</b> , 43             |
| 85 | 18.5  | heneicosanal        | 292, 138, 123, 111, 96, <b>82</b> , 69, 57, 43        |
| 86 | 18.78 | 1,23-tetracosadiene | 334, 137, 123, 109, 96, 82, 69, <b>55</b> , 41        |
| 87 | 18.8  | 1-tetracosene       | 336, 139, 125, 111, <b>97</b> , 83, 69, 57, 43        |
| 88 | 18.9  | 2-docosanone        | 324, 309, 109, 96, 82, 71, <b>58</b> , 43             |
| 89 | 19.0  | docosanal           | 306, 250, 138, 123, 109, 96, <b>82</b> , 69, 57, 43   |
| 90 | 19.2  | 1-pentacosene       | 350, 139, 125, 111, <b>97</b> , 83, 69, 57, 43        |
| 91 | 19.4  | tricosanal          | 320, 137, 124, 109, 96, <b>82</b> , 68, 57, 43        |

|     |      |                |                                                |
|-----|------|----------------|------------------------------------------------|
| 92  | 19.6 | 1-hexacosene   | 364, 139, 125, 111, 97, 83, 69, <b>57</b> , 43 |
| 93  | 19.8 | tetracosanal   | 334, 138, 123, 109, 96, <b>82</b> , 69, 57, 43 |
| 94  | 20.0 | heptacosane    | 380, 125, 111, 97, 85, 71, <b>57</b> , 43      |
| 95  | 20.2 | pentacosanal   | 348, 125, 111, 97, 83, 71, <b>57</b> , 43      |
| 96  | 20.4 | octacosane     | 125, 111, 97, 83, 71, <b>57</b> , 43           |
| 97  | 20.6 | hexacosanal    | 362, 123, 109, 96, 82, 69, <b>57</b> , 43      |
| 98  | 20.9 | nonacosane     | 139, 125, 111, 97, 83, 69, <b>57</b> , 43      |
| 99  | 21.1 | heptacosanal   | 376, 123, 111, 96, 82, 71, <b>57</b> , 43      |
| 100 | 21.4 | triacontane    | 139, 125, 111, 97, 83, 71, <b>57</b> , 43      |
| 101 | 22.0 | hentriacontane | 139, 125, 111, 97, 83, 71, <b>57</b> , 43      |
| 102 | 22.7 | dotriacontane  | 125, 111, 97, 85, 71, <b>57</b> , 43           |

**Table S.6** Identification of peaks in the chromatogram obtained in the Py-GC-MS analysis of HDPE-0w.

| #  | t <sub>r</sub> | Peak identification | Main ions ( <i>m/z</i> )                       |
|----|----------------|---------------------|------------------------------------------------|
| 1  | 2.7            | 1-hexene            | 84, 69, 56, <b>41</b>                          |
| 2  | 4.0            | 1-heptene           | 98, 83, 70, <b>56</b> , 41                     |
| 3  | 4.1            | heptane             | 100, 71, 57, <b>43</b>                         |
| 4  | 6.8            | 1-octene            | 112, 97, 83, 70, <b>55</b> , 41                |
| 5  | 7.0            | octane              | 114, 85, 71, 57, <b>43</b>                     |
| 6  | 8.7            | 1,8-nonadiene       | 109, 96, 81, <b>67</b> , 55, 41                |
| 7  | 8.9            | 1-nonene            | 126, 97, 83, 69, <b>56</b> , 41                |
| 8  | 9.0            | nonane              | 128, 99, 85, 71, 57, <b>43</b>                 |
| 9  | 10.2           | 1,9-decadiene       | 110, 95, 81, 67, <b>55</b> , 41                |
| 10 | 10.3           | 1-decene            | 140, 111, 97, 83, 70, 55, <b>41</b>            |
| 11 | 10.4           | decane              | 142, 117, 99, 85, 71, <b>57</b> , 43           |
| 12 | 11.2           | 1,10-undecadiene    | 124, 109, 95, 81, 67, 55, <b>41</b>            |
| 13 | 11.3           | 1-undecene          | 154, 126, 111, 97, 83, 70, 55, <b>43</b>       |
| 14 | 11.4           | undecane            | 156, 98, 85, 71, <b>57</b> , 43                |
| 15 | 12.1           | 1,11-dodecadiene    | 138, 124, 109, 95, 81, 67, <b>55</b> , 41      |
| 16 | 12.16          | 1-dodecene          | 168, 140, 125, 111, 97, 83, 69, 55, <b>41</b>  |
| 17 | 12.2           | dodecane            | 170, 128, 85, 71, <b>57</b> , 43               |
| 18 | 12.3           | decanal             | 138, 128, 112, 95, 82, 68, 55, <b>41</b>       |
| 19 | 12.87          | 1,12-tridecadiene   | 123, 109, 95, 81, 67, <b>55</b> , 41           |
| 20 | 12.9           | 1-tridecene         | 125, 111, 97, 83, 69, <b>55</b> , 41           |
| 21 | 13.0           | tridecane           | 184, 99, 85, 71, <b>57</b> , 43                |
| 22 | 13.05          | undecanal           | 152, 126, 109, 96, 82, 68, <b>57</b> , 41      |
| 23 | 13.5           | 1,13-tetradecadiene | 123, 109, 96, 81, 67, <b>55</b> , 41           |
| 24 | 13.6           | 1-tetradecene       | 125, 111, 97, 83, 69, <b>55</b> , 41           |
| 25 | 13.7           | tetradecane         | 198, 99, 85, 71, <b>57</b> , 43                |
| 26 | 13.75          | dodecanal           | 166, 140, 123, 110, 96, 82, 68, <b>57</b> , 41 |
| 27 | 14.2           | 1,14-pentadecadiene | 123, 109, 96, 81, 67, <b>55</b> , 41           |
| 28 | 14.27          | 1-pentadecene       | 210, 125, 111, 97, 83, 69, <b>55</b> , 41      |
| 29 | 14.3           | pentadecane         | 212, 113, 99, 85, 71, <b>57</b> , 43           |
| 30 | 14.4           | tridecanal          | 180, 154, 124, 110, 96, 82, 68, <b>57</b> , 43 |
| 31 | 14.8           | 1,15-hexadecadiene  | 123, 109, 96, 82, 67, <b>55</b> , 41           |
| 32 | 14.88          | 1-hexadecene        | 224, 125, 111, 97, 83, 69, 55, <b>41</b>       |
| 33 | 14.9           | hexadecane          | 226, 99, 85, 71, <b>57</b> , 43                |

|    |       |                     |                                                     |
|----|-------|---------------------|-----------------------------------------------------|
| 34 | 15.0  | tetradecanal        | 194, 168, 138, 110, 96, 82, 69, <b>57</b> , 41      |
| 35 | 15.4  | 1,16-heptadecadiene | 137, 123, 109, 96, 82, 69, <b>55</b> , 41           |
| 36 | 15.46 | 1-heptadecene       | 238, 139, 125, 111, 97, 83, 69, <b>55</b> , 41      |
| 37 | 15.5  | heptadecane         | 240, 99, 85, 71, <b>57</b> , 43                     |
| 38 | 15.6  | pentadecanal        | 208, 180, 110, 96, 82, 69, <b>57</b> , 41           |
| 39 | 15.9  | 1,17-octadecadiene  | 123, 109, 96, 82, 69, <b>55</b> , 41                |
| 40 | 16.0  | 1-octadecene        | 252, 125, 111, 97, 83, 69, <b>55</b> , 41           |
| 41 | 16.04 | octadecane          | 254, 99, 85, 71, <b>57</b> , 43                     |
| 42 | 16.1  | hexadecanal         | 222, 123, 109, 96, 82, 69, <b>57</b> , 43           |
| 43 | 16.5  | 1,18-nonadecadiene  | 137, 123, 109, 96, 82, 69, <b>55</b> , 41           |
| 44 | 16.54 | 1-nonadecene        | 139, 125, 111, 97, 83, 69, <b>55</b> , 43           |
| 45 | 16.6  | nonadecane          | 268, 127, 113, 99, 85, 71, <b>57</b> , 43           |
| 46 | 16.7  | heptadecanal        | 236, 208, 137, 123, 110, 96, <b>82</b> , 68, 57, 41 |
| 47 | 17.0  | 1,19-eicosadiene    | 137, 123, 109, 96, 82, 69, <b>55</b> , 41           |
| 48 | 17.03 | 1-eicosene          | 139, 125, 111, <b>97</b> , 83, 69, 55, 43           |
| 49 | 17.06 | eicosane            | 127, 113, 99, 85, 71, <b>57</b> , 43                |
| 50 | 17.2  | octadecanal         | 250, 137, 124, 109, 96, <b>82</b> , 68, 57, 43      |
| 51 | 17.4  | 1,20-heneicosadiene | 137, 123, 109, 96, 82, 69, <b>55</b> , 41           |
| 52 | 17.5  | 1-heneicosene       | 139, 125, 111, <b>97</b> , 83, 69, 55, 43           |
| 53 | 17.53 | heneicosane         | 113, 99, 85, 71, <b>57</b> , 43                     |
| 54 | 17.7  | nonadecanal         | 264, 202, 137, 124, 110, 96, <b>82</b> , 68, 57, 43 |
| 55 | 17.94 | 1,21-docosadiene    | 149, 137, 123, 109, 96, 82, 69, <b>55</b> , 41      |
| 56 | 17.96 | 1-docosene          | 139, 125, 111, <b>97</b> , 83, 69, 55, 43           |
| 57 | 17.98 | docosane            | 310, 97, 85, 71, <b>57</b> , 43                     |
| 58 | 18.1  | eicosanal           | 278, 250, 124, 109, 96, <b>82</b> , 68, 57, 43      |
| 59 | 18.3  | 1,22-tricosadiene   | 137, 123, 109, 96, 82, 69, <b>55</b> , 41           |
| 60 | 18.40 | 1-tricosene         | 322, 125, 111, <b>97</b> , 83, 69, 55, 43           |
| 61 | 18.41 | tricosane           | 324, 111, 97, 85, 71, <b>57</b> , 43                |
| 62 | 18.5  | heneicosanal        | 292, 138, 123, 110, 96, <b>82</b> , 68, 57, 43      |
| 63 | 18.8  | 1,23-tetracosadiene | 334, 137, 123, 109, 96, 82, 69, <b>55</b> , 41      |
| 64 | 18.81 | 1-tetracosene       | 336, 139, 125, 111, <b>97</b> , 83, 69, 55, 43      |
| 65 | 19.0  | docosanal           | 306, 251, 138, 123, 110, 96, <b>82</b> , 68, 57, 43 |
| 66 | 19.2  | 1-pentacosene       | 350, 139, 125, 111, <b>97</b> , 83, 69, 57, 43      |
| 67 | 19.4  | tricosanal          | 320, 138, 124, 110, 96, <b>82</b> , 68, 57, 43      |
| 68 | 19.6  | 1,25-hexacosadiene  | 362, 139, 125, 111, 97, 83, 69, <b>57</b> , 43      |
| 69 | 19.8  | unknown             | <b>297</b> , 149, 105, 77                           |

**Table S.7** Identification of peaks in the chromatogram obtained in the Py-GC-MS analysis of HDPE-4w.

| #  | t <sub>r</sub> | Peak identification | Main ions ( <i>m/z</i> )            |
|----|----------------|---------------------|-------------------------------------|
| 1  | 2.7            | 1-hexene            | 84, 69, 56, <b>41</b>               |
| 2  | 4.0            | 1-heptene           | 98, 83, 70, <b>56</b> , 41          |
| 3  | 4.1            | heptane             | 100, 71, 57, <b>43</b>              |
| 4  | 6.7            | 1-octene            | 112, 97, 83, 70, <b>55</b> , 41     |
| 5  | 6.9            | octane              | 114, 85, 71, 57, <b>43</b>          |
| 6  | 8.7            | 1,8-nonadiene       | 109, 96, 81, <b>67</b> , 55, 41     |
| 7  | 8.9            | 1-nonene            | 126, 97, 83, 69, <b>56</b> , 41     |
| 8  | 9.0            | nonane              | 128, 99, 85, 71, 57, <b>43</b>      |
| 9  | 10.1           | 1,9-decadiene       | 110, 95, 81, 67, <b>55</b> , 41     |
| 10 | 10.2           | 1-decene            | 140, 111, 97, 83, 70, 55, <b>41</b> |

|    |       |                     |                                                       |
|----|-------|---------------------|-------------------------------------------------------|
| 11 | 10.34 | decane              | 142, 113, 99, 85, 71, <b>57</b> , 43                  |
| 12 | 11.2  | 1,10-undecadiene    | 124, 109, 95, 81, 67, 55, <b>41</b>                   |
| 13 | 11.3  | 1-undecene          | 154, 126, 111, 97, 83, 70, <b>55</b> , 41             |
| 14 | 11.36 | undecane            | 156, 98, 85, 71, <b>57</b> , 43                       |
| 15 | 11.4  | nonanal             | 124, 114, 98, 82, 70, <b>57</b> , 41                  |
| 16 | 12.1  | 1,11-dodecadiene    | 138, 124, 109, 95, 81, 67, <b>55</b> , 41             |
| 17 | 12.15 | 1-dodecene          | 168, 140, 125, 111, 97, 83, 69, 55, <b>41</b>         |
| 18 | 12.2  | dodecane            | 170, 128, 85, 71, <b>57</b> , 43                      |
| 19 | 12.3  | decanal             | 138, 128, 112, 95, 82, 70, 57, <b>41</b>              |
| 20 | 12.7  | nonanoic acid       | 158, 129, 115, 98, <b>85</b> , 73, 60, 41             |
| 21 | 12.8  | 1,12-tridecadiene   | 123, 109, 95, 81, 67, <b>55</b> , 41                  |
| 22 | 12.9  | 1-tridecene         | 125, 111, 97, 83, 69, 55, <b>41</b>                   |
| 23 | 13.0  | tridecane           | 184, 99, 85, 71, <b>57</b> , 43                       |
| 24 | 13.04 | undecanal           | 142, 126, 109, 96, 82, 68, 57, <b>41</b>              |
| 25 | 13.4  | decanoic acid       | 172, 129, <b>73</b> , 60, 41                          |
| 26 | 13.48 | undecanol           | 126, 111, 97, <b>85</b> , 69, 55, 41                  |
| 27 | 13.5  | 1,13-tetradecadiene | 123, 109, 95, 81, 67, <b>55</b> , 41                  |
| 28 | 13.6  | 1-tetradecene       | 125, 111, 97, 83, 69, <b>55</b> , 41                  |
| 29 | 13.66 | tetradecane         | 198, 99, 85, 71, <b>57</b> , 43                       |
| 30 | 13.7  | dodecanal           | 166, 140, 123, 110, 96, 82, 68, <b>57</b> , 41        |
| 31 | 14.06 | undecanoic acid     | 186, 143, 129, 115, 85, <b>73</b> , 60, 41            |
| 32 | 14.1  | dodecanol           | 141, 127, 111, 97, 83, 69, <b>55</b> , 43             |
| 33 | 14.2  | 1,14-pentadecadiene | 123, 109, 96, 81, 67, <b>55</b> , 41                  |
| 34 | 14.26 | 1-pentadecene       | 210, 125, 111, 97, 83, 69, <b>55</b> , 41             |
| 35 | 14.3  | pentadecane         | 141, 127, 113, 99, 85, 71, <b>57</b> , 43             |
| 36 | 14.4  | tridecanal          | 180, 154, 124, 110, 96, 82, 69, <b>57</b> , 41        |
| 37 | 14.6  | dodecanoic acid     | 200, 157, 129, 115, 101, 85, <b>73</b> , 60, 43       |
| 38 | 14.77 | tridecanol          | 182, 155, 141, 125, 111, 97, 83, 69, 55, <b>43</b>    |
| 39 | 14.8  | 1,15-hexadecadiene  | 123, 109, 96, 82, 67, <b>55</b> , 41                  |
| 40 | 14.88 | 1-hexadecene        | 224, 125, 111, 97, 83, 69, <b>55</b> , 41             |
| 41 | 14.9  | hexadecane          | 226, 99, 85, 71, <b>57</b> , 43                       |
| 42 | 15.0  | tetradecanal        | 194, 168, 138, 124, 109, 96, 82, 69, <b>57</b> , 41   |
| 43 | 15.2  | tridecanoic acid    | 214, 185, 171, 157, 143, 129, 115, 87, <b>73</b> , 60 |
| 44 | 15.36 | tetradecanol        | 169, 125, 111, 97, 83, 69, <b>55</b> , 43             |
| 45 | 15.4  | 1,16-heptadecadiene | 137, 123, 109, 96, 82, 69, <b>55</b> , 41             |
| 46 | 15.45 | 1-heptadecene       | 238, 139, 125, 111, 97, 83, 69, <b>55</b> , 41        |
| 47 | 15.5  | heptadecane         | 240, 99, 85, 71, <b>57</b> , 43                       |
| 48 | 15.6  | pentadecanal        | 208, 182, 109, 96, 82, 69, <b>57</b> , 41             |
| 49 | 15.8  | tetradecanoic acid  | 228, 185, 129, <b>73</b>                              |
| 50 | 15.93 | pentadecanol        | 183, 125, 111, 97, 83, 69, <b>57</b> , 41             |
| 51 | 15.96 | 1,17-octadecadiene  | 123, 109, 96, 82, 69, <b>55</b> , 41                  |
| 52 | 16.0  | 1-octadecene        | 252, 125, 111, 97, 83, 69, <b>55</b> , 41             |
| 53 | 16.04 | octadecane          | 254, 99, 85, 71, <b>57</b> , 43                       |
| 54 | 16.06 | 2-hexadecanone      | 240, 111, 97, 85, 71, <b>58</b> , 43                  |
| 55 | 16.1  | hexadecanal         | 222, 123, 109, 96, 82, 69, <b>57</b> , 41             |
| 56 | 16.3  | pentadecanoic acid  | 242, 199, 129, <b>73</b> , 60                         |
| 57 | 16.46 | hexadecanol         | 197, 125, 111, 97, 83, 69, <b>55</b> , 43             |
| 58 | 16.5  | 1,18-nonadecadiene  | 137, 123, 109, 96, 82, 69, <b>55</b> , 41             |
| 59 | 16.53 | 1-nonadecene        | 139, 125, 111, 97, 83, 69, <b>55</b> , 43             |
| 60 | 16.55 | nonadecane          | 268, 127, 113, 99, 85, 71, <b>57</b> , 43             |
| 61 | 16.58 | 2-heptadecanone     | 254, 85, 71, <b>58</b> , 43                           |
| 62 | 16.7  | heptadecanal        | 236, 208, 137, 123, 109, 96, <b>82</b> , 69, 57, 43   |

|     |       |                     |                                                     |
|-----|-------|---------------------|-----------------------------------------------------|
| 63  | 16.8  | hexadecanoic acid   | 256, 213, 129, <b>73</b> , 60                       |
| 64  | 16.99 | 1,19-eicosadiene    | 137, 123, 109, 96, 82, 69, <b>55</b> , 41           |
| 65  | 17.0  | 1-eicosene          | 139, 125, 111, <b>97</b> , 83, 69, 55, 43           |
| 66  | 17.04 | eicosane            | 127, 113, 99, 85, 71, <b>57</b> , 43                |
| 67  | 17.09 | 2-octadecanone      | 268, 109, 96, 85, <b>71</b> , 58, 43                |
| 68  | 17.2  | octadecanal         | 250, 137, 123, 109, 96, 82, 69, <b>57</b> , 43      |
| 69  | 17.3  | heptadecanoic acid  | 270, 227, 185, 171, 129, <b>73</b> , 60             |
| 70  | 17.4  | 1,20-heneicosadiene | 137, 123, 109, 96, 82, 69, <b>55</b> , 41           |
| 71  | 17.5  | 1-heneicosene       | 139, 125, 111, <b>97</b> , 83, 69, 55, 43           |
| 72  | 17.52 | heneicosane         | 111, 97, 85, 71, <b>57</b> , 43                     |
| 73  | 17.56 | 2-nonadecanone      | 282, 127, 111, 97, 85, 71, <b>58</b> , 43           |
| 74  | 17.7  | nonadecanal         | 264, 236, 137, 123, 109, 96, <b>82</b> , 69, 57, 43 |
| 75  | 17.8  | octadecanoic acid   | 284, 241, 185, 129, <b>73</b> , 60                  |
| 76  | 17.92 | 1,21-docosadiene    | 137, 123, 109, 96, 82, 69, <b>55</b> , 41           |
| 77  | 17.95 | 1-docosene          | 139, 125, 111, <b>97</b> , 83, 69, 55, 43           |
| 78  | 17.97 | docosane            | 310, 97, 85, 71, <b>57</b> , 43                     |
| 79  | 18.02 | 2-eicosanone        | 297, 127, 96, 85, 71, <b>58</b> , 43                |
| 80  | 18.1  | eicosanal           | 278, 250, 123, 109, 96, <b>82</b> , 69, 57, 43      |
| 81  | 18.2  | nonadecanoic acid   | 298, 255, 129, 85, <b>73</b>                        |
| 82  | 18.37 | 1,22-tricosadiene   | 137, 123, 111, 97, 83, 69, <b>55</b> , 41           |
| 83  | 18.39 | 1-tricosene         | 322, 125, 111, <b>97</b> , 83, 69, 57, 43           |
| 84  | 18.40 | tricosane           | 324, 111, 97, 85, 71, <b>57</b> , 43                |
| 85  | 18.46 | 2-heneicosanone     | 310, 124, 109, 96, 85, 71, 58, <b>43</b>            |
| 86  | 18.5  | heneicosanal        | 292, 137, 123, 111, 96, <b>82</b> , 69, 57, 43      |
| 87  | 18.78 | 1,23-tetracosadiene | 334, 137, 123, 111, 97, 83, 69, <b>55</b> , 43      |
| 88  | 18.8  | 1-tetracosene       | 336, 139, 125, 111, <b>97</b> , 83, 69, 57, 43      |
| 89  | 18.9  | 2-docosanone        | 324, 309, 109, 96, 82, 71, <b>59</b> , 43           |
| 90  | 19.0  | docosanal           | 306, 250, 137, 125, 111, 97, 82, 71, <b>57</b> , 43 |
| 91  | 19.2  | 1-pentacosene       | 350, 139, 125, 111, 97, 83, 69, <b>57</b> , 43      |
| 92  | 19.4  | tricosanal          | 320, 137, 123, 111, 97, 82, 69, <b>57</b> , 43      |
| 93  | 19.6  | 1,25-hexacosadiene  | 362, 139, 125, 111, 97, 83, 69, <b>55</b> , 43      |
| 94  | 19.7  | tetracosanal        | 334, 138, 123, 109, 96, <b>82</b> , 68, 57, 43      |
| 95  | 20.0  | heptacosane         | 380, 125, 111, 97, 85, 71, <b>57</b> , 43           |
| 96  | 20.2  | pentacosanal        | 348, 123, 111, 97, 83, 69, <b>57</b> , 43           |
| 97  | 20.4  | octacosane          | 125, 111, 97, 85, 71, <b>57</b> , 43                |
| 98  | 20.6  | hexacosanal         | 362, 123, 111, 96, 82, 69, <b>57</b> , 43           |
| 99  | 20.9  | nonacosane          | 139, 125, 111, 97, 83, 71, <b>57</b> , 43           |
| 100 | 21.1  | heptacosanal        | 376, 123, 111, 96, 82, 71, <b>57</b> , 43           |
| 101 | 21.4  | triacontane         | 139, 125, 111, 97, 83, 71, <b>57</b> , 43           |

**Table S.8** List of the main pyrolysis products in the chromatogram obtained in the Py(HMDS)-GC-MS analysis of the DCM extract of PP-0w (**Figure S.12**).

| # | t <sub>r</sub> | Peak identification           | Main ions ( <i>m/z</i> )            |
|---|----------------|-------------------------------|-------------------------------------|
| 1 | 13.2           | 2,4-dimethyl-1-heptene        | 165, 149, 126, 83, <b>70</b> , 55   |
| 2 | 16.5           | HMDS unknown                  | <b>222</b> , 206, 190, 176, 132, 74 |
| 3 | 17.2           | hexamethyl-cyclotrisiloxane   | <b>207</b> , 191, 96                |
| 4 | 17.8           | octamethyl-cyclotetrasiloxane | <b>281</b> , 265, 149, 191, 133, 73 |
| 5 | 17.9           | p- tolypentamethyl-disiloxane | 238, <b>223</b> , 207, 149, 104, 73 |
| 6 | 18.4           | decamethyl-tetrasiloxane      | 295, <b>207</b> , 73                |

|    |      |                                                     |                                          |
|----|------|-----------------------------------------------------|------------------------------------------|
| 7  | 18.5 | unknown                                             | <b>236</b> , 204, 190, 132, 73           |
| 8  | 18.7 | unknown                                             | 177, <b>162</b> , 134, 100, 73           |
| 9  | 19.0 | unknown                                             | 222, 206, 193, <b>130</b> , 116, 100, 73 |
| 10 | 19.2 | unknown                                             | 280, <b>266</b> , 192, 125               |
|    |      | 2,2,3,3,7,7,8,8-octamethyl-4,6-dioxo-5-aza-2,3,7,8- |                                          |
| 11 | 20.1 | tetrasilanonane                                     | 294, <b>206</b> , 190, 73                |
| 12 | 21.4 | unknown                                             | <b>293</b> , 205, 146, 130, 73           |
| 13 | 23.4 | tetradecamethyl-hexasiloxane                        | 443, 355, 281, 267, 221, 147, <b>73</b>  |
| 14 | 24.5 | decanoic acid, trimethylsilyl ester                 | 244, <b>229</b> , 145, 129, 117, 73      |
| 15 | 24.7 | tetradecamethylcycloheptasiloxane                   | 503, 415, 341, 327, 281, 147, <b>73</b>  |
| 16 | 25.2 | 1-cyclohexyldimethylsilyloxyundec-2-ene             | <b>227</b> , 143, 129, 75                |

**Table S.9** List of the main pyrolysis products in the chromatogram obtained in the Py(HMDS)-GC-MS analysis of the MeOH extract of PS-0w (**Figure S.13**).

| #  | t <sub>r</sub> | Peak identification                                                                         | Main ions (m/z)                               |
|----|----------------|---------------------------------------------------------------------------------------------|-----------------------------------------------|
| 1  | 14.8           | ethylbenzene                                                                                | 106, <b>91</b> , 77, 65, 51                   |
| 2  | 15.4           | styrene                                                                                     | <b>104</b> , 89, 78, 63, 51                   |
| 3  | 15.5           | silanamine, 1,1,1-trimethyl-N-(trimethylsilyl)-                                             | <b>146</b> , 130, 100, 73, 59                 |
| 4  | 16.0           | benzene, (1-methylethyl)-                                                                   | 120, <b>105</b> , 91, 77, 51                  |
| 5  | 16.6           | unknown                                                                                     | 175, 146, <b>132</b> , 115, 102               |
| 6  | 16.7           | HMDS unknown                                                                                | <b>222</b> , 206, 190, 132, 74                |
| 7  | 17.3           | HMDS unknown                                                                                | <b>220</b> , 207, 132, 73                     |
| 8  | 17.4           | cyclotrisiloxane, hexamethyl-                                                               | <b>207</b> , 191, 133, 96                     |
| 9  | 17.9           | cyclotetrasiloxane, octamethyl-                                                             | <b>281</b> , 265, 207, 191, 133, 73           |
| 10 | 18.5           | tetrasiloxane, decamethyl-                                                                  | 295, <b>207</b> , 191, 73                     |
| 11 | 18.6           | silane, trimethylphenoxy-<br>propanoic acid, 2-[(trimethylsilyl)oxy]-, trimethylsilyl       | 166, <b>151</b> , 135, 91, 77                 |
| 12 | 18.8           | ester                                                                                       | 191, <b>147</b> , 133, 117, 73                |
| 13 | 19.9           | cyclotetrasiloxane, octamethyl-<br>4,6-dioxo-5-aza-2,3,7,8-tetrasilanonane-2,2,3,3,7,7,8,8- | <b>281</b> , 265, 249, 133, 73                |
| 14 | 20.1           | octamethyl-                                                                                 | 294, <b>206</b> , 190, 130, 73                |
| 15 | 20.9           | cyclopentasiloxane, decamethyl                                                              | 355, 267, 251, 187, <b>73</b>                 |
| 16 | 21.3           | pentasiloxane, dodecamethyl-                                                                | 369, 353, <b>281</b> , 265, 249, 207, 147, 43 |
| 17 | 21.4           | unknown                                                                                     | <b>293</b> , 205, 189, 146, 130, 73           |
| 18 | 22.7           | cyclohexasiloxane, dodecamethyl-                                                            | 429, 341, 207, 147, <b>73</b>                 |
| 19 | 23.4           | hexasiloxane, tetradecamethyl-                                                              | 443, 355, 281, 267, 221, 147, <b>73</b>       |
| 20 | 25.2           | HMDS unknown                                                                                | 265, 250, <b>146</b> , 132, 73                |
| 21 | 25.9           | propane-1,2-diylidibenzen                                                                   | 196, 115, <b>105</b> , 91, 77                 |
| 22 | 26.4           | 1-pentene-2,4-diylidibenzen                                                                 | 165, <b>105</b> , 91, 77                      |
| 23 | 26.7           | benzene, 1,1'-(1,2-dimethyl-1,2-ethanediyl)bis-                                             | 210, <b>105</b> , 91, 77                      |
| 24 | 27.8           | 3-butene-1,3-diylidibenzene (styrene dimer)                                                 | 208, 193, 130, 115, 104, <b>91</b> , 77, 65   |
| 25 | 28.4           | 1H-indene, 2-phenyl-                                                                        | <b>192</b> , 165, 115, 91                     |
| 26 | 28.5           | naphthalene, 1,2,3,4-tetrahydro-1-phenyl-                                                   | <b>208</b> , 191, 180, 165, 152, 130, 115, 91 |
| 27 | 28.7           | naphthalene, 1,2-dihydro-4-phenyl-                                                          | <b>206</b> , 191, 128, 115, 91                |
| 28 | 28.8           | anthracene                                                                                  | <b>178</b> , 152, 89, 76                      |
| 29 | 29.9           | unknown                                                                                     | 299, 281, 237, <b>163</b> , 135, 103, 73      |
| 30 | 30.4           | fluoranthene, 1,2,3,10b-tetrahydro-                                                         | 206, 190, <b>178</b> , 165, 152, 89, 76       |
| 31 | 30.7           | unknown                                                                                     | 161, 147, 117, 103, <b>73</b>                 |
| 32 | 30.9           | hexadecanoic acid, trimethylsilyl ester                                                     | 328, 313, 145, 129, 117, 73                   |
| 33 | 32.6           | octadecanoic acid, trimethylsilyl ester                                                     | 341, 145, 129, 117, <b>73</b>                 |
| 34 | 33.0           | unknown                                                                                     | 161, 147, 133, 117, 103, 87, <b>73</b>        |



**Table S.10** List of the main pyrolysis products in the chromatogram obtained in the Py(HMDS)-GC-MS analysis of the DCM extract of LDPE-4w (**Figure 14**).

| #  | t <sub>r</sub> | Peak identification                                                 | Main ions ( <i>m/z</i> )                          |
|----|----------------|---------------------------------------------------------------------|---------------------------------------------------|
| 1  | 15.2           | butanoic acid, trimethylsilyl ester                                 | 145, 117, <b>75</b>                               |
| 2  | 15.4           | silanamine, 1,1,1-trimethyl-N-(trimethylsilyl)-                     | <b>146</b> , 130, 100, 73, 59                     |
| 3  | 16.2           | 2-butenic acid, trimethylsilyl ester                                | <b>143</b> , 99, 75                               |
| 4  | 16.5           | unknown                                                             | 175, 146, <b>132</b> , 115, 73                    |
| 5  | 16.6           | HMDS unknown                                                        | <b>222</b> , 206, 190, 176, 132, 74               |
| 6  | 16.7           | HMDS unknown                                                        | 237, <b>222</b> , 206, 190, 176, 132, 74          |
| 7  | 17.0           | 4-pentenoic acid, trimethylsilyl ester                              | 157, 117, <b>75</b>                               |
| 8  | 17.2           | pentanoic acid, trimethylsilyl ester                                | 159, 145, 132, 117, <b>75</b>                     |
| 9  | 17.3           | HMDS unknown                                                        | <b>220</b> , 207, 132, 73                         |
| 10 | 17.4           | hexamethyl-cyclotrisiloxane                                         | <b>207</b> , 191, 96                              |
| 11 | 17.8           | 3-butenic acid, -methyl-, trimethylsilyl ester                      | 172, 157, 113, 82, <b>75</b>                      |
| 12 | 17.9           | cyclotetrasiloxane, octamethyl-                                     | <b>281</b> , 265, 249, 207, 191, 133, 73          |
| 13 | 18.5           | tetrasiloxane, decamethyl-                                          | 295, <b>207</b> , 191, 73                         |
| 14 | 18.7           | hexenoic acid, trimethylsilyl ester                                 | 171, 129, 117, <b>75</b>                          |
| 15 | 18.8           | propanoic acid, 2-[(trimethylsilyl)oxy]-, trimethylsilyl ester      | 191, <b>147</b> , 133, 117, 73                    |
| 16 | 19.0           | hexanoic acid, trimethylsilyl ester                                 | 173, 145, 131, 117, <b>75</b>                     |
| 17 | 19.1           | acetic acid, [(trimethylsilyl)oxy]-, trimethylsilyl ester           | 205, 177, <b>147</b> , 133, 73                    |
| 18 | 19.4           | undecane                                                            | 156, 113, 98, 85, 71, <b>57</b>                   |
| 19 | 20.0           | pentanoic acid, 4-oxo, trimethylsilyl ester                         | 173, 145, 131, <b>75</b>                          |
| 20 | 20.1           | 4,6-dioxo-5-aza-2,3,7,8-tetrasilanonane-2,2,3,3,7,7,8,8-octamethyl- | 294, <b>206</b> , 190, 130, 73                    |
| 21 | 20.2           | propanoic acid, 3-[(trimethylsilyl)oxy]-, trimethylsilyl ester      | 219, 177, <b>147</b> , 133, 116, 73               |
| 22 | 20.3           | heptenoic acid, trimethylsilyl ester                                | 185, 129, 117, <b>75</b>                          |
| 24 | 20.5           | heptanoic acid, trimethylsilyl ester                                | 187, 131, 117, <b>75</b>                          |
| 25 | 20.7           | pentasiloxane, dodecamethyl-                                        | 369, 281, 207, 147, <b>73</b>                     |
| 26 | 20.8           | 1-dodecene                                                          | 168, 111, 97, 83, 69, <b>55</b>                   |
| 27 | 21.3           | pentasiloxane, dodecamethyl-                                        | 369, 353, <b>281</b> , 265, 249, 207, 147, 43     |
| 28 | 21.4           | unknown                                                             | <b>293</b> , 277, 205, 189, 146, 130,             |
| 29 | 21.7           | benzoic acid, trimethylsilyl ester                                  | 194, <b>179</b> , 135, 105, 77, 51                |
| 30 | 21.8           | octenoic acid, trimethylsilyl ester                                 | 199, 129, 117, <b>75</b>                          |
| 31 | 21.9           | octanoic acid, trimethylsilyl ester                                 | 201, 145, 129, 117, <b>75</b>                     |
| 32 | 22.3           | 1-tridecene                                                         | 182, 154, 125, 111, 97, 83, 69, <b>55</b>         |
| 33 | 22.7           | butanedioic acid, bis(trimethylsilyl ester)                         | 247, 172, <b>147</b> , 129, 73                    |
| 34 | 22.8           | butanedioic acid, methyl-, bis(trimethylsilyl) ester                | 261, 232, 217, 186, <b>147</b> , 73               |
| 35 | 23.2           | cyclohexasiloxane, dodecamethyl-                                    | 429, 341, 147, <b>73</b>                          |
| 36 | 23.2           | nonenoic acid, trimethylsilyl ester                                 | <b>215</b> , 145, 129, 117, 73                    |
| 37 | 23.3           | nonanoic acid, trimethylsilyl ester                                 | 230, <b>215</b> , 145, 129, 117, 73               |
| 38 | 23.4           | hexasiloxane, tetradecamethyl-                                      | 443, 355, 281, 267, 221, 147, <b>73</b>           |
| 39 | 23.7           | 1-tetradecene                                                       | 196, 141, 125, 111, 97, 83, 69, <b>55</b>         |
| 40 | 23.9           | pentanedioic acid, bis(trimethylsilyl) ester                        | 261, 233, 204, 158, <b>147</b> , 129, 116, 97, 73 |
| 41 | 24.4           | decenoic acid, trimethylsilyl ester                                 | 227, 145, 129, 117, <b>75</b>                     |
| 42 | 24.5           | decanoic acid, trimethylsilyl ester                                 | <b>229</b> , 145, 129, 117, 73                    |

|    |       |                                                  |                                                   |
|----|-------|--------------------------------------------------|---------------------------------------------------|
| 43 | 24.9  | 1-pentadecene                                    | 210, 140, 125, 111, 83, 69, <b>55</b>             |
| 44 | 25.0  | pentadecane                                      | 212, 141, 127, 113, 99, 85, 71, <b>57</b>         |
| 45 | 25.2  | hexanedioic acid, bis(trimethylsilyl) ester      | 275, 217, 204, 172, 147, 129, 111, <b>73</b>      |
| 46 | 25.6  | undecenoic acid, trimethylsilyl ester            | 241, 145, 129, 117, 96, <b>75</b>                 |
| 47 | 25.7  | undecanoic acid, trimethylsilyl ester            | <b>243</b> , 145, 129, 117, 95, 73                |
| 48 | 26.2  | 1-hexadecene                                     | 224, 125, 111, 97, 83, 69, <b>55</b>              |
| 49 | 26.3  | hexadecane                                       | 226, 127, 113, 99, 85, 71, <b>57</b>              |
| 50 | 26.4  | heptanedioic acid, bis(trimethylsilyl) ester     | 289, 217, 204, 186, 155, 147, 125, 97, <b>73</b>  |
| 51 | 26.8  | dodecenoic acid, trimethylsilyl ester            | 255, 201, 145, 129, 117, <b>73</b>                |
| 52 | 26.9  | dodecanoic acid, trimethylsilyl ester            | <b>257</b> , 201, 145, 129, 117, 73               |
| 53 | 27.3  | 1-heptadecene                                    | 238, 125, 111, 97, 83, 69, <b>55</b>              |
| 54 | 27.4  | octanedioic acid, bis(trimethylsilyl) ester      | 303, 217, 187, 169, 147, 129, 117, <b>73</b>      |
| 55 | 27.8  | tridecenoic acid, trimethylsilyl ester           | 269, 145, 129, 117, <b>73</b>                     |
| 56 | 27.9  | tridecanoic acid, trimethylsilyl ester           | 271, 145, 129, 117, <b>73</b>                     |
| 57 | 28.4  | 1-octadecene                                     | 252, 139, 125, 111, 97, 83, 69, <b>55</b>         |
| 58 | 28.5  | nonanedioic acid, bis(trimethylsilyl) ester      | 317, 217, 201, 147, 129, 117, 97, <b>73</b>       |
| 59 | 28.9  | tetradecenoic acid, trimethylsilyl ester         | 283, 145, 129, 117, <b>73</b>                     |
| 60 | 29.0  | tetradecanoic acid, trimethylsilyl ester         | 300, <b>285</b> , 145, 132, 117, 73               |
| 61 | 29.4  | 1-nonadecene                                     | 266, 139, 125, 111, 97, 83, 69, <b>55</b>         |
| 62 | 29.5  | decanedioic acid, bis(trimethylsilyl) ester      | 331, 315, 215, 204, 185, 147, 129, 117, <b>73</b> |
| 63 | 29.8  | pentadecenoic acid, trimethylsilyl ester         | 297, 145, 129, 117, <b>73</b>                     |
| 64 | 29.9  | pentadecanoic acid, trimethylsilyl ester         | 299, 145, 129, 117, <b>73</b>                     |
| 65 | 30.4  | eicosane                                         | 282, 127, 113, 99, 85, 71, <b>57</b>              |
| 66 | 30.5  | undecanedioic acid, bis(trimethylsilyl) ester    | 345, 317, 129, 117, <b>73</b>                     |
| 67 | 30.8  | hexadecenoic acid, trimethylsilyl ester          | 311, 145, 129, 117, <b>73</b>                     |
| 68 | 30.9  | hexadecanoic acid, trimethylsilyl ester          | <b>313</b> , 145, 129, 117, 73                    |
| 69 | 31.2  | 1,20-heneicosadiene                              | 123, 109, 96, 82, 69, <b>55</b>                   |
| 70 | 31.3  | 1-heneicosene                                    | 139, 125, 111, <b>97</b> , 83, 69, 55             |
| 71 | 31.4  | heneicosane                                      | 296, 127, 113, 99, 85, 71, <b>57</b>              |
| 72 | 31.7  | heptadecenoic acid, trimethylsilyl ester         | 325, 145, 129, 117, <b>73</b>                     |
| 73 | 31.8  | heptadecanoic acid, trimethylsilyl ester         | 342, <b>327</b> , 201, 145, 132, 117, 73          |
| 74 | 32.1  | 1,21-docosadiene                                 | 306, 123, 109, 96, 82, 69, <b>55</b>              |
| 75 | 32.2  | 1-docosene                                       | 139, 125, 111, <b>97</b> , 83, 69, 55             |
| 76 | 32.3  | docosane                                         | 127, 113, 99, 85, 71, <b>57</b>                   |
| 77 | 32.5  | 2,2-bis[(4-trimethylsiloxy)phenyl]propane        | 372, <b>357</b> , 207, 73                         |
| 78 | 32.6  | octadecenoic acid, trimethylsilyl ester          | 339, 145, 129, <b>117</b> , 97, 75                |
| 79 | 32.7  | octadecanoic acid, trimethylsilyl ester          | 341, 145, 129, 117, <b>73</b>                     |
| 80 | 33.0  | 1,22-tricosadiene                                | 137, 123, 109, 96, 82, 69, <b>55</b>              |
| 81 | 33.06 | 1-tricosene                                      | 322, 125, 111, <b>97</b> , 83, 69, 55             |
| 82 | 33.1  | tricosane                                        | 324, 113, 97, 85, 71, <b>57</b>                   |
| 83 | 33.4  | nonadecenoic acid, trimethylsilyl ester          | <b>353</b> , 145, 129, 117, 97, 75                |
| 84 | 33.5  | nonadecanoic acid, trimethylsilyl ester          | 355, 145, 132, <b>117</b> , 97, 73                |
| 85 | 33.8  | 1,23-tetracosadiene                              | 334, 137, 123, 109, 96, 83, 69, <b>55</b>         |
| 86 | 33.9  | 1-tetracosene                                    | 336, 139, 125, 111, 97, 83, 69, <b>57</b>         |
| 87 | 33.91 | tetracosane                                      | 338, 127, 113, 99, 85, 71, <b>57</b>              |
| 88 | 34.2  | eicosenoic acid, trimethylsilyl ester            | 367, 145, 129, 117, 97, <b>73</b>                 |
| 89 | 34.3  | eicosanoic acid, trimethylsilyl ester            | 384, <b>369</b> , 341, 201, 145, 132, 117, 73     |
| 90 | 34.5  | hexanedicandioic acid, bis(trimethylsilyl) ester | 415, 229, 217, 204, 129, 117, <b>73</b>           |
| 91 | 34.6  | 1,24-pentacosadiene                              | 137, 123, 109, 96, 82, 69, <b>55</b>              |
| 92 | 34.7  | 1-pentacosene                                    | 139, 125, 111, <b>97</b> , 83, 69, 57             |
| 93 | 34.9  | heneicosenoic acid, trimethylsilyl ester         | 381, 145, 129, 117, <b>73</b>                     |
| 94 | 35.0  | heneicosanoic acid, trimethylsilyl ester         | 398, 383, 145, 132, <b>117</b> , 73               |

|     |      |                                                    |                                          |
|-----|------|----------------------------------------------------|------------------------------------------|
| 95  | 35.3 | heptanedecanedioic acid, bis(trimethylsilyl) ester | 429, 313, 217, 204, 129, 117, <b>73</b>  |
| 96  | 35.4 | 1-hexacosene                                       | 139, 125, 111, 97, 83, 69, <b>57</b>     |
| 97  | 35.7 | docosenoic acid, trimethylsilyl ester              | 395, 145, 129, 117, <b>73</b>            |
| 98  | 35.8 | docosanoic acid, trimethylsilyl ester              | 412, 397, 145, 129, 117, 97, <b>73</b>   |
| 99  | 36.0 | octanedecanedioic acid, bis(trimethylsilyl) ester  | 443, 327, 217, 204, 129, 117, <b>73</b>  |
| 100 | 36.1 | 1-heptacosene                                      | 139, 125, 111, <b>97</b> , 83, 69, 57    |
| 101 | 36.4 | tricosenoic acid, trimethylsilyl ester             | 409, 145, 129, 117, 97, <b>73</b>        |
| 102 | 36.5 | tricosanoic acid, trimethylsilyl ester             | 411, 145, 129, 117, <b>73</b>            |
| 103 | 36.9 | 1-octacosene                                       | 139, 125, 111, 97, 83, 69, <b>57</b>     |
| 104 | 37.2 | tetracosanoic acid, trimethylsilyl ester           | 425, 145, 129, 117, 97, <b>73</b>        |
| 105 | 37.7 | 1-nonacosene                                       | 139, 125, 111, 97, 83, 69, <b>57</b>     |
| 106 | 38.0 | pentacosanoic acid, trimethylsilyl ester           | 454, 439, 145, 132, <b>117</b> , 73      |
| 107 | 38.5 | 1-triacontene                                      | 139, 125, 111, 97, 83, 69, <b>57</b>     |
| 108 | 38.9 | hexacosanoic acid, trimethylsilyl ester            | 468, 453, 145, 132, <b>117</b> , 73      |
| 109 | 39.6 | 1-hentriacontene                                   | 139, 125, 111, 97, 83, 71, <b>57</b>     |
| 110 | 40.0 | heptacosanoic acid, trimethylsilyl ester           | 482, 467, 369, 145, 129, <b>117</b> , 73 |
| 111 | 40.7 | 1-dotriacontene                                    | 139, 125, 111, 97, 83, 71, <b>57</b>     |
| 112 | 41.3 | octacosanoic acid, trimethylsilyl ester            | 496, 481, 145, 129, 117, 97, <b>73</b>   |
| 113 | 42.2 | 1-tritriacontene                                   | 139, 125, 111, 97, 83, 69, <b>57</b>     |
| 114 | 42.8 | nonacosanoic acid, trimethylsilyl ester            | 510, 495, 145, 132, <b>117</b> , 73      |
| 115 | 43.9 | 1-tetratriacontene                                 | 139, 125, 111, 97, 83, 71, <b>57</b>     |
| 116 | 44.6 | triacontanoic acid, trimethylsilyl acid            | 524, 509, 145, 132, <b>117</b> , 97, 73  |
| 117 | 45.9 | 1-pentatriacontene                                 | 139, 125, 111, 97, 83, 71, <b>57</b>     |
| 118 | 46.8 | hentriacontanoic acid, trimethylsilyl ester        | 538, 523, 145, 132, 117, 97, <b>73</b>   |
| 119 | 47.9 | 1-hexatriacontene                                  | 139, 125, 111, 97, 83, 71, <b>57</b>     |
| 120 | 48.7 | dotriacontanoic acid, trimethylsilyl ester         | 552, 537, 145, 129, 117, <b>73</b>       |
| 121 | 50.9 | tritriacontanoic acid, trimethylsilyl ester        | 556, 551, 145, 132, 117, <b>73</b>       |
| 122 | 53.5 | tetratriacontanoic acid, trimethylsilyl ester      | 580, 565, 145, 132, 117, <b>73</b>       |
| 123 | 56.7 | pentatriacontanoic acid, trimethylsilyl ester      | 594, 579, 145, 132, 117, <b>73</b>       |

**Table S.11** List of the main pyrolysis products in the chromatogram obtained in the Py(HMDS)-GC-MS analysis of the DCM extract of LDPE-0w (**Figure S.15**).

| #  | t <sub>r</sub> | Peak identification                                 | Main ions ( <i>m/z</i> )            |
|----|----------------|-----------------------------------------------------|-------------------------------------|
| 1  | 13.4           | unknown                                             | <b>164</b> , 134, 118, 74           |
| 2  | 14.7           | silanamine, 1,1,1-trimethyl-N-(trimethylsilyl)-     | <b>146</b> , 130, 100, 73, 59       |
| 3  | 16.3           | HMDS unknown                                        | <b>222</b> , 206, 190, 176, 132, 74 |
| 4  | 16.4           | HMDS unknown                                        | <b>220</b> , 206, 190, 132, 74      |
| 5  | 17.0           | hexamethyl-cyclotrisiloxane                         | <b>207</b> , 191, 96                |
| 6  | 17.1           | HMDS unknown                                        | <b>220</b> , 204, 132, 73           |
| 7  | 17.2           | HMDS unknown                                        | 223, <b>207</b> , 191, 133          |
| 8  | 18.4           | decamethyltetrasiloxane                             | 295, <b>207</b> , 73                |
| 9  | 18.5           | HMDS unknown                                        | <b>236</b> , 204, 190, 132, 73      |
| 10 | 18.9           | HMDS unknown                                        | 222, <b>206</b> , 190, 132, 74      |
|    |                | 2,2,3,3,7,7,8,8-octamethyl-4,6-dioxo-5-aza-2,3,7,8- |                                     |
| 11 | 20.1           | tetrasilanonane                                     | 294, <b>206</b> , 190, 73           |
| 12 | 21.5           | HMDS unknown                                        | <b>293</b> , 205, 146, 130, 73      |
| 13 | 23.2           | dodecamethylcyclohexasiloxane                       | 429, 341, 325, 147, <b>73</b>       |
| 14 | 24.3           | HMDS unknown                                        | 428, 340, 324, 206, 146, <b>73</b>  |
| 15 | 24.4           | unknown                                             | 231, 216, <b>146</b> , 130, 73      |
| 16 | 24.5           | HMDS unknown                                        | 428, 340, 324, 206, 146, <b>73</b>  |

|    |      |                                   |                                         |
|----|------|-----------------------------------|-----------------------------------------|
| 17 | 24.7 | tetradecamethylcycloheptasiloxane | 503, 415, 341, 327, 281, 147, <b>73</b> |
| 18 | 26.3 | hexadecane                        | 226, 113, 99, 85, 71, <b>57</b>         |
| 19 | 28.5 | octadecane                        | 254, 113, 99, 85, 71, <b>57</b>         |
| 20 | 30.5 | eicosane                          | 282, 113, 99, 85, 71, <b>57</b>         |
| 21 | 32.3 | docosane                          | 310, 113, 99, 85, 71, <b>57</b>         |
| 22 | 33.9 | tetracosane                       | 338, 113, 99, 85, 71, <b>57</b>         |
| 23 | 35.5 | hexacosane                        | 366, 113, 99, 85, 71, <b>57</b>         |
| 24 | 36.9 | octacosane                        | 127, 113, 99, 85, 71, <b>57</b>         |
| 25 | 38.6 | triacontane                       | 127, 113, 99, 85, 71, <b>57</b>         |

**Table S.12** List of the main pyrolysis products in the chromatogram obtained in the Py(HMDS)-GC-MS analysis of the DCM extract of HDPE-0w.

| #  | t <sub>r</sub> | Peak identification                                 | Main ions ( <i>m/z</i> )                |
|----|----------------|-----------------------------------------------------|-----------------------------------------|
| 1  | 13.4           | unknown                                             | <b>164</b> , 134, 118, 74               |
| 2  | 14.7           | silanamine, 1,1,1-trimethyl-N-(trimethylsilyl)-     | <b>146</b> , 130, 100, 73, 59           |
| 3  | 16.3           | HMDS unknown                                        | <b>222</b> , 206, 190, 176, 132, 74     |
| 4  | 16.4           | HMDS unknown                                        | <b>220</b> , 206, 190, 132, 74          |
| 5  | 17.0           | hexamethyl-cyclotrisiloxane                         | <b>207</b> , 191, 96                    |
| 6  | 17.1           | HMDS unknown                                        | <b>220</b> , 204, 132, 73               |
| 7  | 17.2           | HMDS unknown                                        | 223, <b>207</b> , 191, 133              |
| 8  | 18.4           | decamethyltetrasiloxane                             | 295, <b>207</b> , 73                    |
| 9  | 18.5           | HMDS unknown                                        | <b>236</b> , 204, 190, 132, 73          |
| 10 | 18.9           | HMDS unknown                                        | 222, <b>206</b> , 190, 132, 74          |
|    |                | 2,2,3,3,7,7,8,8-octamethyl-4,6-dioxa-5-aza-2,3,7,8- |                                         |
| 11 | 20.1           | tetrasilanonane                                     | 294, <b>206</b> , 190, 73               |
| 12 | 21.5           | HMDS unknown                                        | <b>293</b> , 205, 146, 130, 73          |
| 13 | 23.2           | dodecamethylcyclohexasiloxane                       | 429, 341, 325, 147, <b>73</b>           |
| 14 | 24.3           | HMDS unknown                                        | 428, 340, 324, 206, 146, <b>73</b>      |
| 15 | 24.4           | unknown                                             | 231, 216, <b>146</b> , 130, 73          |
| 16 | 24.5           | HMDS unknown                                        | 428, 340, 324, 206, 146, <b>73</b>      |
| 17 | 24.7           | tetradecamethylcycloheptasiloxane                   | 503, 415, 341, 327, 281, 147, <b>73</b> |
| 18 | 26.3           | hexadecane                                          | 226, 113, 99, 85, 71, <b>57</b>         |
| 19 | 28.5           | octadecane                                          | 254, 113, 99, 85, 71, <b>57</b>         |
| 20 | 30.5           | eicosane                                            | 282, 113, 99, 85, 71, <b>57</b>         |
| 21 | 32.3           | docosane                                            | 310, 113, 99, 85, 71, <b>57</b>         |
| 22 | 33.9           | tetracosane                                         | 338, 113, 99, 85, 71, <b>57</b>         |
| 23 | 35.5           | hexacosane                                          | 366, 113, 99, 85, 71, <b>57</b>         |
| 24 | 36.9           | octacosane                                          | 127, 113, 99, 85, 71, <b>57</b>         |
| 25 | 38.6           | triacontane                                         | 127, 113, 99, 85, 71, <b>57</b>         |

**Table S.13** List of the main pyrolysis products in the chromatogram obtained in the Py(HMDS)-GC-MS analysis of the DCM extract of HDPE-4w.

| # | t <sub>r</sub> | Peak identification                             | Main ions ( <i>m/z</i> )      |
|---|----------------|-------------------------------------------------|-------------------------------|
| 1 | 15.2           | 3-butenic acid, trimethylsilyl ester            | 143, 117, 99, <b>73</b>       |
| 2 | 15.5           | silanamine, 1,1,1-trimethyl-N-(trimethylsilyl)- | <b>146</b> , 130, 100, 73, 59 |
| 3 | 16.3           | 2-butenic acid, trimethylsilyl ester            | <b>143</b> , 99, 75           |

|    |       |                                                                     |                                                        |
|----|-------|---------------------------------------------------------------------|--------------------------------------------------------|
| 4  | 16.6  | unknown                                                             | 175, 146, <b>132</b> , 115, 73                         |
| 5  | 16.7  | HMDS unknown                                                        | <b>222</b> , 206, 190, 176, 132, 74                    |
| 6  | 17.0  | 4-pentenoic acid, trimethylsilyl ester                              | 157, 117, <b>75</b>                                    |
| 7  | 17.2  | pentanoic acid, trimethylsilyl ester                                | 159, 145, 132, 117, <b>75</b>                          |
| 8  | 17.3  | HMDS unknown                                                        | <b>220</b> , 207, 132, 73                              |
| 9  | 17.4  | hexamethyl-cyclotrisiloxane                                         | <b>207</b> , 191, 96                                   |
| 10 | 17.44 | 1-decene                                                            | 140, 111, 97, 83, 70, <b>55</b>                        |
| 11 | 17.9  | cyclotetrasiloxane, octamethyl-                                     | <b>281</b> , 265, 207, 191, 133, 73                    |
| 12 | 18.5  | tetrasiloxane, decamethyl-                                          | 295, <b>207</b> , 191, 73                              |
| 13 | 18.8  | hexenoic acid, trimethylsilyl ester                                 | 171, 129, 117, <b>75</b>                               |
| 14 | 19.0  | hexanoic acid, trimethylsilyl ester                                 | 173, 117, <b>75</b>                                    |
| 15 | 20.0  | pentanoic acid, 4-oxo, trimethylsilyl ester                         | 173, 145, 131, <b>75</b>                               |
| 16 | 20.1  | 4,6-dioxa-5-aza-2,3,7,8-tetrasilanonane-2,2,3,3,7,7,8,8-octamethyl- | 294, <b>206</b> , 190, 130, 73                         |
| 17 | 20.2  | propanoic acid, 3-[(trimethylsilyl)oxy]-, trimethylsilyl ester      | 219, 177, <b>147</b> , 133, 116, 73                    |
| 18 | 20.4  | heptenoic acid, trimethylsilyl ester                                | 185, 129, 117, <b>75</b>                               |
| 19 | 20.5  | heptanoic acid, trimethylsilyl ester                                | 187, 131, 117, <b>75</b>                               |
| 20 | 20.7  | pentasiloxane, dodecamethyl-                                        | 369, 281, 207, 147, <b>73</b>                          |
| 21 | 21.3  | pentasiloxane, dodecamethyl-                                        | 369, 353, <b>281</b> , 265, 249, 207, 147, 43          |
| 22 | 21.4  | unknown                                                             | <b>293</b> , 277, 205, 189, 146, 130,                  |
| 23 | 21.7  | benzoic acid, trimethylsilyl ester                                  | 194, <b>179</b> , 135, 105, 77, 51                     |
| 24 | 21.8  | octenoic acid, trimethylsilyl ester                                 | 199, 129, 117, <b>75</b>                               |
| 25 | 21.9  | octanoic acid, trimethylsilyl ester                                 | 201, 145, 129, 117, <b>75</b>                          |
| 26 | 22.3  | 1-tridecene                                                         | 182, 125, 111, 97, 83, 69, <b>55</b>                   |
| 27 | 22.7  | butanedioic acid, bis(trimethylsilyl) ester                         | 247, 172, <b>147</b> , 129, 73                         |
| 28 | 23.2  | nonenoic acid, trimethylsilyl ester                                 | <b>215</b> , 145, 129, 117, 73                         |
| 29 | 23.3  | nonanoic acid, trimethylsilyl ester                                 | 230, <b>215</b> , 145, 129, 117, 73                    |
| 30 | 23.4  | hexasiloxane, tetradecamethyl-                                      | 443, 355, 281, 221, 147, <b>73</b>                     |
| 31 | 23.8  | tetradecane                                                         | 198, 127, 113, 99, 85, 71, <b>57</b>                   |
| 32 | 23.9  | pentanedioic acid, bis(trimethylsilyl) ester                        | 261, 233, 204, 158, <b>147</b> , 129, 116, 97, 73      |
| 33 | 24.4  | decanoic acid, trimethylsilyl ester                                 | 227, 145, 129, 117, <b>75</b>                          |
| 34 | 24.5  | decanoic acid, trimethylsilyl ester                                 | <b>229</b> , 145, 129, 117, 73                         |
| 35 | 25.2  | hexanedioic acid, bis(trimethylsilyl) ester                         | 275, 217, 204, 172, 159, 147, 129, 111, <b>73</b>      |
| 36 | 25.6  | undecenoic acid, trimethylsilyl ester                               | 241, 145, 129, 117, 96, <b>75</b>                      |
| 37 | 25.7  | undecanoic acid, trimethylsilyl ester                               | <b>243</b> , 145, 129, 117, 95, 73                     |
| 38 | 26.2  | 1-hexadecene                                                        | 224, 125, 111, 97, 83, 69, <b>55</b>                   |
| 39 | 26.3  | hexadecane                                                          | 226, 127, 113, 99, 85, 71, <b>57</b>                   |
| 40 | 26.4  | heptanedioic acid, bis(trimethylsilyl) ester                        | 289, 217, 204, 186, 173, 155, 147, 125, 97, <b>73</b>  |
| 41 | 26.8  | dodecenoic acid, trimethylsilyl ester                               | 255, 201, 145, 129, 117, <b>73</b>                     |
| 42 | 26.9  | dodecanoic acid, trimethylsilyl ester                               | <b>257</b> , 201, 145, 129, 117, 73                    |
| 43 | 27.0  | cyclooctasiloxane, hexadecamethyl-                                  | 415, 401, 355, 281, 221, 147, <b>73</b>                |
| 44 | 27.3  | 1-heptadecene                                                       | 238, 125, 111, 97, 83, 69, <b>55</b>                   |
| 45 | 27.4  | octanedioic acid, bis(trimethylsilyl) ester                         | 303, 217, 187, 169, 147, 129, 117, <b>73</b>           |
| 46 | 27.8  | tridecenoic acid, trimethylsilyl ester                              | 269, 145, 129, 117, <b>73</b>                          |
| 47 | 27.9  | tridecanoic acid, trimethylsilyl ester                              | 271, 145, 129, 117, <b>73</b>                          |
| 48 | 28.5  | nonanedioic acid, bis(trimethylsilyl) ester                         | 317, 217, 201, 147, 129, 117, 97, <b>73</b>            |
| 49 | 28.9  | tetradecenoic acid, trimethylsilyl ester                            | 283, 145, 129, 117, <b>73</b>                          |
| 50 | 29.0  | tetradecanoic acid, trimethylsilyl ester                            | 300, <b>285</b> , 145, 132, 117, 73                    |
| 51 | 29.4  | 1-nonadecene                                                        | 266, 139, 125, 111, 97, 83, 69, <b>55</b>              |
| 52 | 29.5  | decanedioic acid, bis(trimethylsilyl) ester                         | 331, 315, 215, 204, 185, 166, 147, 129, 117, <b>73</b> |
| 53 | 29.9  | pentadecenoic acid, trimethylsilyl ester                            | 297, 145, 129, 117, <b>73</b>                          |

|    |      |                                               |                                               |
|----|------|-----------------------------------------------|-----------------------------------------------|
| 54 | 30.0 | pentadecanoic acid, trimethylsilyl ester      | 299, 145, 129, 117, <b>73</b>                 |
| 55 | 30.5 | eicosane                                      | 282, 127, 113, 99, 85, 71, <b>57</b>          |
| 56 | 30.7 | hexadecenoic acid, trimethylsilyl ester       | 311, 145, 129, 117, <b>73</b>                 |
| 57 | 30.9 | hexadecanoic acid, trimethylsilyl ester       | <b>313</b> , 145, 129, 117, 73                |
| 58 | 31.3 | dodecanedioic acid, bis(trimethylsilyl) ester | 359, 243, 217, 204, 129, 117, <b>73</b>       |
| 59 | 31.7 | heptadecenoic acid, trimethylsilyl ester      | 325, 145, 129, 117, <b>73</b>                 |
| 60 | 31.8 | heptadecanoic acid, trimethylsilyl ester      | 342, <b>327</b> , 201, 145, 132, 117, 73      |
| 61 | 32.3 | docosane                                      | 310, 127, 113, 99, 85, 71, <b>57</b>          |
| 62 | 32.4 | octadecenoic acid, trimethylsilyl ester       | 339, 145, 129, <b>117</b> , 97, 75            |
| 63 | 32.7 | octadecanoic acid, trimethylsilyl ester       | 341, 145, 129, 117, <b>73</b>                 |
| 64 | 33.0 | tetradecandioic acid, trimethylsilyl ester    | 387, 271, 217, 204, 147, 129, 117, <b>73</b>  |
| 65 | 33.5 | nonadecanoic acid, trimethylsilyl ester       | 355, 145, 132, <b>117</b> , 97, 73            |
| 66 | 33.9 | tetracosane                                   | 338, 127, 113, 99, 85, 71, <b>57</b>          |
| 67 | 34.2 | eicosanoic acid, trimethylsilyl ester         | 384, <b>369</b> , 341, 201, 145, 132, 117, 73 |
| 68 | 35.4 | hexacosane                                    | 127, 113, 99, 85, 71, <b>57</b>               |
| 69 | 36.9 | octacosane                                    | 141, 127, 113, 99, 85, 71, <b>57</b>          |
| 70 | 38.5 | nonacosane                                    | 131, 127, 113, 99, 85, 71, <b>57</b>          |

**Table S.14** List of the main pyrolysis products in the chromatograms obtained in the Py-GC-MS analysis of the extraction residues of both PP-0w and PP-4w (**Figure 17**).

| #  | t <sub>r</sub> | Peak identification                                    | Main ions ( <i>m/z</i> )                       |
|----|----------------|--------------------------------------------------------|------------------------------------------------|
| 1  | 2.3            | 1-propene                                              | 41                                             |
| 2  | 2.6            | n-pentane                                              | 72, 57, <b>43</b>                              |
| 3  | 3.0            | 2-methyl-pentane                                       | 84, 71, 57, <b>43</b>                          |
| 4  | 3.2            | 2-methyl-1-pentene                                     | 84, 69, <b>56</b> , 41                         |
| 5  | 3.8            | 2,4-dimethyl-1-pentene                                 | 98, 83, <b>56</b> , 41                         |
| 6  | 4.4            | 2-methyl-1,5-hexadiene                                 | 95, <b>81</b> , 67, 55, 39                     |
| 7  | 5.0            | 3-methyl-2,4-hexadiene                                 | 96, <b>81</b> , 67, 53, 39                     |
| 8  | 6.6            | 4-methyl-2-heptene                                     | 112, 97, 83, <b>69</b> , 55, 41                |
| 9  | 6.8            | 4-methylheptane                                        | 114, <b>70</b> , 55, 43                        |
| 10 | 7.0            | 2,5-dimethyl-1,5-hexadiene                             | 110, <b>95</b> , 67, 55, 39                    |
| 11 | 8.1            | 2,4-dimethylheptane                                    | 85, 71, 57, <b>43</b>                          |
| 12 | 8.3            | 1,3,5-trimethylcyclohexane                             | 126, <b>111</b> , 69, 55, 41                   |
| 13 | 8.6            | 2,4-dimethyl-1-heptene                                 | 126, 83, 70, 55, <b>43</b>                     |
| 14 | 8.8            | 1,3,5-trimethylcyclohexane (isomer)                    | 126, <b>111</b> , 69, 55, 41                   |
| 15 | 9.0            | 2,4-dimethyl-1,6-heptadiene                            | 124, <b>109</b> , 81, 67, 55, 41               |
| 16 | 9.4            | 2,4,6-trimethyl-1-heptene                              | 140, 83, 69, 55, <b>43</b>                     |
| 17 | 9.7            | 2,4,6-trimethyl-1,6-heptadiene                         | 123, <b>82</b> , 67, 55, 41                    |
| 18 | 10.7           | 4,6-dimethyl-2-nonene                                  | 154, 111, 85, <b>69</b> , 55, 41               |
| 19 | 11.5           | 2,4,6-trimethyl-1-nonene (meso form)                   | 125, 111, 83, <b>69</b> , 57, 43               |
| 20 | 11.6           | 2,4,6-trimethyl-1-nonene (racemic form)                | 125, 111, 83, <b>69</b> , 57, 43               |
| 21 | 12.0           | 2,4,6,8-tetramethyl-1-nonene (racemic form)            | 182, 125, 111, 83, <b>69</b> , 57, 43          |
| 22 | 12.2           | 2,4,6,8-tetramethyl-1,8-nonadiene (racemic form)       | 180, 165, 123, 109, 96, 83, <b>69</b> , 55, 41 |
| 23 | 13.4           | 2,4,6,8-tetramethyl-1-undecene (isotactic)             | 154, 111, 85, <b>69</b> , 55, 43               |
| 24 | 13.5           | 2,4,6,8-tetramethyl-1-undecene (syndiotactic)          | 154, 111, 85, <b>69</b> , 55, 43               |
| 25 | 13.7           | 2,4,6,8,10-pentamethyl-1-undecene (syndiotactic)       | 224, 168, 125, 111, 97, 83, <b>69</b> , 57, 43 |
| 26 | 13.9           | 2,4,6,8,10-pentamethyl-1,10-undecadiene (syndiotactic) | 123, 109, 95, 83, <b>69</b> , 55, 41           |
| 27 | 14.2           | unknown                                                | 153, 111, 97, 85, <b>69</b> , 57, 41           |

|    |      |                                                                          |                                                |
|----|------|--------------------------------------------------------------------------|------------------------------------------------|
| 28 | 14.7 | 2,4,6,8,10-pentamethyl-1,14-tridecadiene                                 | 250, 123, 109, 95, 83, <b>69</b> , 55, 41      |
| 29 | 14.8 | 2,4,6,8,10-pentamethyl-1-tridecene (isotactic)                           | 252, 153, 125, 111, 97, 83, <b>69</b> , 57, 43 |
| 30 | 15.0 | unknown                                                                  | 196, 153, 125, 111, 97, 83, <b>69</b> , 57, 43 |
| 31 | 15.1 | unknown                                                                  | 153, 125, 111, 97, 83, <b>69</b> , 57, 43      |
| 32 | 15.2 | 2,4,6,8,10,12-hexamethyl-1,12-tridecadiene (syndiotactic)                | 264, 165, 123, 109, 95, 83, <b>69</b> , 55, 41 |
| 33 | 15.9 | 2,4,6,8,10,12-hexamethyl-1,14-pentadecadiene                             | 292, 151, 123, 109, 97, 83, <b>69</b> , 55, 41 |
| 34 | 16.1 | 2,4,6,8,10,12-hexamethyl-1-pentadecene                                   | 294, 153, 125, 111, 97, 83, <b>69</b> , 57, 43 |
| 35 | 16.2 | unknown                                                                  | 294, 153, 125, 111, 97, 83, <b>69</b> , 57, 43 |
| 36 | 16.5 | 2,4,6,8,10,12,14-heptamethyl-1,14-pentadecadiene                         | 306, 165, 123, 109, 97, 83, <b>69</b> , 55, 41 |
| 37 | 17.1 | 2,4,6,8,10,12,14-heptmethyl-1,16-heptadecadiene                          | 334, 151, 123, 109, 97, 83, <b>69</b> , 55, 41 |
| 38 | 17.2 | 2,4,6,8,10,12,14-heptamethyl-1-heptadecene                               | 336, 153, 125, 111, 97, 83, <b>69</b> , 57, 43 |
| 39 | 17.5 | 2,4,6,8,10,12,14,16-octamethyl-1,16-eptadecadiene                        | 348, 165, 123, 109, 97, 83, <b>69</b> , 55, 41 |
| 40 | 18.1 | 2,4,6,8,10,12,14,16-octamethyl-1,18-nonadecadiene                        | 376, 151, 125, 109, 97, 83, <b>69</b> , 55, 41 |
| 41 | 18.2 | 2,4,6,8,10,12,14,16-octamethyl-1-nonadecene                              | 378, 153, 125, 111, 97, 83, <b>69</b> , 57, 43 |
| 42 | 18.5 | 2,4,6,8,10,12,14,16,18-nonamethyl-1,18-nonadecadiene                     | 390, 165, 125, 109, 97, 83, <b>69</b> , 55, 41 |
| 43 | 19.0 | 2,4,6,8,10,12,14,16,18-nonamethyl-1,20-henicosadiene                     | 418, 153, 125, 111, 97, 83, <b>69</b> , 55, 41 |
| 44 | 19.1 | 2,4,6,8,10,12,14,16,18-nonamethyl-1-henicosene                           | 153, 139, 125, 111, 97, 83, <b>69</b> , 57, 43 |
| 45 | 19.4 | 2,4,6,8,10,12,14,16,18,20-decamethyl-1,20-henicosadiene                  | 432, 165, 125, 109, 97, 83, <b>69</b> , 55, 43 |
| 46 | 19.8 | 2,4,6,8,10,12,14,16,18,20-decamethyl-1,22-tricosadiene                   | 460, 153, 125, 111, 97,83, <b>69</b> , 55, 41  |
| 47 | 19.9 | 2,4,6,8,10,12,14,16,18,20-decamethyl-1-tricosene                         | 153, 139, 125, 111, 97, 83, <b>69</b> , 57, 43 |
| 48 | 20.3 | 2,4,6,8,10,12,14,16,18,20,22-undecamethyl-1,22-tricosadiene              | 474, 125, 111, 97, 83, <b>69</b> , 55, 43      |
| 49 | 20.8 | 2,4,6,8,10,12,14,16,18,20,22-undecamethyl-1,24-pentacosadiene            | 502, 153, 125, 111, 97, 83, <b>69</b> , 55, 43 |
| 50 | 20.9 | 2,4,6,8,10,12,14,16,18,20,22-undecamethyl-1-pentacosene                  | 153, 139, 125, 111, 97, 83, <b>69</b> , 57, 43 |
| 51 | 21.3 | 2,4,6,8,10,12,14,16,18,20,22,24-dodecamethyl-1,24-pentacosadiene         | 516, 153, 125, 111, 97, 83, <b>69</b> , 55, 43 |
| 52 | 21.9 | 2,4,6,8,10,12,14,16,18,20,22,24-dodecamethyl-1,26-heptacosadiene         | 544, 153, 125, 111, 97, 83, <b>69</b> , 55, 43 |
| 53 | 22.1 | 2,4,6,8,10,12,14,16,18,20,22,24-dodecamethyl-1-heptacosene               | 153, 139, 125, 111, 97, 83, <b>69</b> , 57, 43 |
| 54 | 22.6 | 2,4,6,8,10,12,14,16,18,20,22,24,26-tridecamethyl-1,26-heptacosadiene     | 560, 165, 125, 111, 97, 83, <b>69</b> , 57, 43 |
| 55 | 23.5 | 2,4,6,8,10,12,14,16,18,20,22,24,26-tridecamethyl-1,28-nonacosadiene      | 588, 153, 125, 111, 97, 83, <b>69</b> , 57, 43 |
| 56 | 23.7 | 2,4,6,8,10,12,14,16,18,20,22,24,26-tridecamethyl-1-nonacosene            | 153, 139, 125, 111, 97, 83, <b>69</b> , 57, 43 |
| 57 | 24.5 | 2,4,6,8,10,12,14,16,18,20,22,24,26,28-tetradecamethyl-1,28-nonacosadiene | 153, 139, 125, 111, 97, 83, <b>69</b> , 57, 43 |

---

**Table S.15** List of the main pyrolysis products in the chromatograms obtained in the Py-GC-MS analysis of the extraction residues of both PS-0w and PS-4w (**Figure 18**).

| #  | t <sub>r</sub> | Peak identification                             | Main ions ( <i>m/z</i> )                    |
|----|----------------|-------------------------------------------------|---------------------------------------------|
| 1  | 6.82           | toluene                                         | 92, <b>91</b> , 65                          |
| 2  | 9.44           | styrene                                         | <b>104</b> , 78, 63, 51                     |
| 3  | 10.15          | allylbenzene                                    | <b>117</b> , 103, 91, 65                    |
| 4  | 10.59          | $\alpha$ -methylstyrene                         | <b>118</b> , 103, 91, 78, 63, 51            |
| 5  | 11.27          | 3-butenylbenzene                                | 132, 104, <b>91</b> , 65                    |
| 6  | 11.41          | (1-methylenepropyl)-benzene                     | 132, <b>117</b> , 103, 91, 77, 63, 51       |
| 7  | 14.95          | 1,2-diphenylethane                              | 182, <b>91</b> , 65                         |
| 8  | 15.14          | propane-1,2-diylidibenzene                      | 196, <b>105</b> , 91, 77, 65                |
| 9  | 15.71          | 1,1'-(1,3-propanediyl)bis-benzene               | 196, 105, <b>92</b> , 77, 65, 51            |
| 10 | 16.07          | Stilbene                                        | 180, <b>179</b> , 165, 152, 102, 89, 76     |
| 11 | 16.11          | 3-butene-1,3-diylidibenzene (styrene dimer)     | 208, 193, 130, 115, 104, <b>91</b> , 77, 65 |
| 12 | 16.16          | 1-pentene-2,4-diylidibenzen                     | 222, 194, 179, 115, <b>105</b> , 91, 77     |
| 13 | 16.64          | (E)-1-butene-1,4-diylidibenzene                 | 208, <b>117</b> , 115, 91, 65               |
| 14 | 17.01          | hexa-1,5-diene-2,5-diylidibenzene               | 234, 143, <b>130</b> , 115, 104, 91, 77, 65 |
| 15 | 19.51          | 5-hexene-1,3,5-triyltribenzene (styrene trimer) | 312, 207, 194, 117, <b>91</b> , 77          |

**Table S.16** List of the main pyrolysis products in the chromatograms obtained in the Py-GC-MS analysis of the extraction residues of both PET-0w and PET-4w (**Figure S.16**).

| #  | t <sub>r</sub> | Peak identification                | Main ions ( <i>m/z</i> )                |
|----|----------------|------------------------------------|-----------------------------------------|
| 1  | 2.27           | carbon dioxide                     | <b>44</b>                               |
| 2  | 4.13           | benzene                            | <b>78</b> , 63, 51                      |
| 3  | 8.88           | ethylbenzene                       | 106, <b>91</b> , 77, 65, 51             |
| 4  | 9.37           | styrene                            | <b>104</b> , 78, 63, 51                 |
| 5  | 10.35          | benzaldehyde                       | 106, <b>105</b> , 77, 51                |
| 6  | 10.66          | phenol                             | <b>94</b> , 79, 66, 55, 39              |
| 7  | 11.27          | benzeneacetaldehyde                | 120, <b>91</b> , 65, 51                 |
| 8  | 11.51          | acetophenone                       | 120, <b>105</b> , 77, 51                |
| 9  | 12.15          | vinyl benzoate                     | 148, <b>105</b> , 77, 51                |
| 10 | 12.87          | benzoic acid                       | 122, <b>105</b> , 77, 51                |
| 11 | 13.00          | benzoic acid trimethylsilyl ester  | 194, <b>179</b> , 135, 105, 77          |
| 12 | 14.03          | biphenyl                           | <b>154</b> , 131, 115, 76               |
| 13 | 14.82          | unknown                            | <b>147</b> , 119, 104, 91, 76           |
| 14 | 15.15          | divinyl terephthalate              | <b>175</b> , 147, 132, 104, 76          |
| 15 | 15.54          | 4-(vinylloxycarbonyl) benzoic acid | <b>149</b> , 121, 76, 65                |
| 16 | 16.05          | stilbene                           | <b>180</b> , 179, 165, 152, 102, 89, 76 |
| 17 | 16.31          | 9H-fluoren-9-one                   | <b>180</b> , 152, 126, 76               |
| 18 | 16.99          | unknown                            | 198, <b>181</b> , 152, 76               |
| 19 | 18.24          | ethan-1,2-diylidibenzoate          | 227, <b>105</b> , 77, 51                |
| 20 | 18.47          | unknown                            | <b>230</b> , 198, 181, 152, 115         |



|    |       |                                          |                              |
|----|-------|------------------------------------------|------------------------------|
| 21 | 20.12 | 2-(benzoyloxy) ethyl vinyl terephthalate | 297, 149, 105, 77            |
| 22 | 22.52 | ethan-1,2-diyl divinyl diterephthalate   | 367, 325, 296, 175, 162, 104 |

**Table S.17** List of the main pyrolysis products in the chromatograms obtained in the Py-GC-MS analysis of the extraction residues of both 0w and 4w LDPE and HDPE (**Figure 19**).

| #  | t <sub>r</sub> | Peak identification | Main ions ( <i>m/z</i> )                       |
|----|----------------|---------------------|------------------------------------------------|
| 1  | 3.16           | 1-hexene            | 84, 69, <b>56</b> , 41                         |
| 2  | 4.60           | 1-heptene           | 98, 83, 70, 56, <b>41</b>                      |
| 3  | 4.79           | heptane             | 100, 71, 57, <b>43</b>                         |
| 4  | 7.23           | 1,7-octadiene       | 110, 95, 82, <b>67</b> , 54, 41                |
| 5  | 7.43           | 1-octene            | 112, 97, 83, 70, <b>55</b> , 41                |
| 6  | 7.62           | octane              | 114, 85, 71, 57, <b>43</b>                     |
| 7  | 9.21           | 1,8-nonadiene       | 109, 96, 81, 67, <b>55</b> , 41                |
| 8  | 9.34           | 1-nonene            | 126, 97, 83, 69, <b>56</b> , 41                |
| 9  | 9.47           | nonane              | 128, 99, 85, 71, 57, <b>43</b>                 |
| 10 | 10.57          | 1,9-decadiene       | 110, 95, 81, 67, <b>55</b> , 41                |
| 11 | 10.66          | 1-decene            | 140, 111, 97, 83, 70, 55, <b>41</b>            |
| 12 | 10.75          | decane              | 142, 113, 99, 85, 71, <b>57</b> , 43           |
| 13 | 11.59          | 1,10-undecadiene    | 124, 109, 95, 81, 67, 55, <b>41</b>            |
| 14 | 11.67          | 1-undecene          | 154, 125, 111, 97, 83, 70, 55, <b>41</b>       |
| 15 | 11.74          | undecane            | 156, 98, 85, 71, <b>57</b> , 43                |
| 16 | 12.45          | 1,11-dodecadiene    | 138, 124, 109, 95, 81, 67, <b>55</b> , 41      |
| 17 | 12.51          | 1-dodecene          | 168, 140, 125, 111, 97, 83, 69, 55, <b>41</b>  |
| 18 | 12.57          | dodecane            | 170, 128, 85, 71, <b>57</b> , 43               |
| 19 | 13.20          | 1,12-tridecadiene   | 123, 109, 95, 81, 67, <b>55</b> , 41           |
| 20 | 13.26          | 1-tridecene         | 125, 111, 97, 83, 69, 55, <b>41</b>            |
| 21 | 13.31          | tridecane           | 184, 99, 85, 71, <b>57</b> , 43                |
| 22 | 13.90          | 1,13-tetradecadiene | 123, 109, 96, 81, 67, <b>55</b> , 41           |
| 23 | 13.95          | 1-tetradecene       | 125, 111, 97, 83, 69, 55, <b>41</b>            |
| 24 | 14.00          | tetradecane         | 198, 99, 85, 71, <b>57</b> , 43                |
| 25 | 14.54          | 1,14-pentadecadiene | 123, 109, 96, 81, 67, <b>55</b> , 41           |
| 26 | 14.59          | 1-pentadecene       | 210, 125, 111, 97, 83, 69, 55, <b>41</b>       |
| 27 | 14.63          | pentadecane         | 212, 113, 99, 85, 71, <b>57</b> , 43           |
| 28 | 15.15          | 1,15-hexadecadiene  | 123, 109, 96, 82, 67, <b>55</b> , 41           |
| 29 | 15.19          | 1-hexadecene        | 224, 125, 111, 97, 83, 69, <b>55</b> , 41      |
| 30 | 15.22          | hexadecane          | 226, 99, 85, 71, <b>57</b> , 43                |
| 31 | 15.73          | 1,16-heptadecadiene | 137, 123, 109, 96, 82, 69, <b>55</b> , 41      |
| 32 | 15.76          | 1-heptadecene       | 238, 139, 125, 111, 97, 83, 69, <b>55</b> , 41 |
| 33 | 15.80          | heptadecane         | 240, 99, 85, 71, <b>57</b> , 43                |
| 34 | 16.27          | 1,17-octadecadiene  | 123, 109, 96, 82, 69, <b>55</b> , 41           |
| 35 | 16.30          | 1-octadecene        | 252, 125, 111, 97, 83, 69, <b>55</b> , 41      |
| 36 | 16.34          | octadecane          | 254, 99, 85, 71, <b>57</b> , 43                |
| 37 | 16.78          | 1,18-nonadecadiene  | 137, 123, 109, 96, 82, 69, <b>55</b> , 41      |
| 38 | 16.82          | 1-nonadecene        | 139, 125, 111, 97, 83, 69, 55, <b>43</b>       |
| 39 | 16.85          | nonadecane          | 268, 127, 113, 99, 85, 71, <b>57</b> , 43      |
| 40 | 17.29          | 1,19-eicosadiene    | 137, 123, 109, 96, 82, 69, <b>55</b> , 41      |
| 41 | 17.31          | 1-eicosene          | 139, 125, 111, <b>97</b> , 83, 69, 57, 43      |
| 42 | 17.34          | eicosane            | 127, 113, 99, 85, 71, <b>57</b> , 43           |
| 43 | 17.75          | 1,20-heneicosadiene | 137, 123, 109, 96, 82, 69, <b>55</b> , 41      |
| 44 | 17.78          | 1-heneicosene       | 139, 125, 111, <b>97</b> , 83, 69, 55, 43      |

|    |       |                     |                                                |
|----|-------|---------------------|------------------------------------------------|
| 45 | 17.81 | heneicosane         | 113, 97, 85, 71, <b>57</b> , 43                |
| 46 | 18.21 | 1,21-docosadiene    | 151, 137, 123, 109, 96, 82, 69, <b>55</b> , 41 |
| 47 | 18.23 | 1-docosene          | 139, 125, 111, 97, 83, 69, <b>57</b> , 43      |
| 48 | 18.25 | docosane            | 310, 99, 85, 71, <b>57</b> , 43                |
| 49 | 18.64 | 1,22-tricosadiene   | 137, 123, 109, 96, 82, 69, <b>55</b> , 41      |
| 50 | 18.66 | 1-tricosene         | 322, 125, 111, 97, 83, 69, <b>55</b> , 43      |
| 51 | 18.68 | tricosane           | 324, 113, 97, 85, 71, <b>57</b> , 43           |
| 52 | 19.06 | 1,23-tetracosadiene | 334, 137, 123, 109, 96, 83, 69, <b>55</b> , 41 |
| 53 | 19.08 | 1-tetracosene       | 336, 139, 125, 111, 97, 83, 69, <b>57</b> , 43 |
| 54 | 19.47 | 1-pentacosene       | 350, 139, 125, 111, 97, 83, 69, <b>57</b> , 43 |
| 55 | 19.87 | 1-hexacosene        | 364, 139, 125, 111, 97, 83, 69, <b>57</b> , 43 |
| 56 | 20.28 | 1-heptacosene       | 378, 139, 125, 111, 97, 83, 71, <b>57</b> , 43 |
| 57 | 21.22 | 1-octacosene        | 139, 125, 111, 97, 83, 71, <b>57</b> , 43      |
| 58 | 21.78 | 1-nonacosene        | 139, 125, 111, 97, 83, 71, <b>57</b> , 43      |
| 59 | 22.43 | 1-triacontene       | 139, 125, 111, 97, 83, 71, <b>57</b> , 43      |
| 60 | 23.18 | 1-hentriacontene    | 139, 125, 111, 97, 83, 71, <b>57</b> , 43      |
| 61 | 24.07 | 1-dotriacontane     | 139, 125, 111, 97, 83, 69, <b>57</b> , 43      |
| 62 | 24.48 | unknown             | 153, 125, 111, 97, 83, <b>69</b> , 57, 43      |
| 63 | 25.13 | 1-tritriacontene    | 139, 125, 111, 97, 83, 71, <b>57</b> , 43      |

---
